# Supplementary material for: Testing the Translational Power of the Zebrafish: An Interspecies Analysis of Responses to Cardiovascular Drugs
Source: PubMed Central journal article supplement (PMC6707810; doi:10.3389/fphar.2019.00893), 2019-08-16
Supplement: DataSheet_1.pdf [file DataSheet_1.pdf]

*Supplementary Material*

**Supplementary Table 1.** Descriptive statistics of seven zebrafish cardiovascular endpoints quantified by in vivo imaging after 1h exposure to propranolol.

| <b>Propranolol – Atrium beat rate - 1h</b>      |          |        |          |          |          |
|-------------------------------------------------|----------|--------|----------|----------|----------|
| Treatment ( $\mu$ M)                            | Ctrl     | 16     | 32       | 64       | 125      |
| Number of values                                | 5        | 5      | 5        | 6        | 6        |
| Minimum                                         | 210.3    | 195.7  | 174.8    | 171      | 106.5    |
| 25% Percentile                                  | 210.5    | 197.9  | 177.5    | 174      | 125      |
| Median                                          | 234      | 204    | 189.3    | 185.7    | 156.5    |
| 75% Percentile                                  | 239.2    | 223    | 215.9    | 204.2    | 171.1    |
| Maximum                                         | 241.1    | 223.4  | 223.6    | 217.1    | 188.3    |
| Mean                                            | 226.7    | 209.2  | 194.2    | 189.1    | 150.7    |
| Std. Deviation                                  | 15.01    | 12.97  | 20.95    | 17.08    | 28.41    |
| Std. Error of Mean                              | 6.713    | 5.802  | 10.47    | 6.974    | 11.6     |
| Lower 95% CI                                    | 208      | 193.1  | 160.9    | 171.1    | 120.9    |
| Upper 95% CI                                    | 245.3    | 225.3  | 227.6    | 207      | 180.5    |
| <b>Propranolol – Ventriculum beat rate - 1h</b> |          |        |          |          |          |
| Treatment ( $\mu$ M)                            | Ctrl     | 16     | 32       | 64       | 125      |
| Number of values                                | 5        | 5      | 5        | 6        | 6        |
| Minimum                                         | 210.2    | 193.4  | 174.9    | 169.1    | 111.4    |
| 25% Percentile                                  | 210.5    | 196.4  | 177.8    | 173.4    | 129.7    |
| Median                                          | 237.3    | 204    | 189.8    | 187.3    | 159.5    |
| 75% Percentile                                  | 240.8    | 222.9  | 214.7    | 204.2    | 171.2    |
| Maximum                                         | 243.6    | 223.3  | 221.9    | 217.1    | 189      |
| Mean                                            | 228      | 208.5  | 194.1    | 189.3    | 153.4    |
| Std. Deviation                                  | 16.14    | 13.67  | 19.99    | 17.39    | 26.7     |
| Std. Error of Mean                              | 7.22     | 6.115  | 9.997    | 7.099    | 10.9     |
| Lower 95% CI                                    | 207.9    | 191.5  | 162.3    | 171      | 125.4    |
| Upper 95% CI                                    | 248      | 225.5  | 225.9    | 207.5    | 181.4    |
| <b>Propranolol – A:V beat ratio - 1h</b>        |          |        |          |          |          |
| Treatment ( $\mu$ M)                            | Ctrl     | 16     | 32       | 64       | 125      |
| Number of values                                | 5        | 5      | 5        | 6        | 6        |
| Minimum                                         | 0.98     | 1      | 0.99     | 0.98     | 0.96     |
| 25% Percentile                                  | 0.9875   | 1      | 0.9925   | 0.995    | 0.9675   |
| Median                                          | 1        | 1      | 1        | 1        | 0.985    |
| 75% Percentile                                  | 1        | 1      | 1.008    | 1.005    | 1        |
| Maximum                                         | 1        | 1      | 1.01     | 1.02     | 1        |
| Mean                                            | 0.995    | 1      | 1        | 1        | 0.9833   |
| Std. Deviation                                  | 0.008367 | 0      | 0.008165 | 0.01265  | 0.01862  |
| Std. Error of Mean                              | 0.003416 | 0      | 0.004082 | 0.005164 | 0.007601 |
| Lower 95% CI                                    | 0.9862   | 1      | 0.987    | 0.9867   | 0.9638   |
| Upper 95% CI                                    | 1.004    | 1      | 1.013    | 1.013    | 1.003    |
| <b>Propranolol – Dorsal Aorta Diameter - 1h</b> |          |        |          |          |          |
| Treatment ( $\mu$ M)                            | Ctrl     | 16     | 32       | 64       | 125      |
| Number of values                                | 6        | 5      | 6        | 6        | 6        |
| Minimum                                         | 11.49    | 11.74  | 11.66    | 12.85    | 14.01    |
| 25% Percentile                                  | 12.43    | 12.33  | 12.44    | 13.38    | 14.14    |
| Median                                          | 13.5     | 12.91  | 13.25    | 13.82    | 14.69    |
| 75% Percentile                                  | 14.77    | 13.98  | 14.09    | 14.3     | 15.87    |
| Maximum                                         | 15.53    | 14.51  | 14.49    | 14.83    | 17.41    |
| Mean                                            | 13.54    | 13.1   | 13.22    | 13.83    | 15.05    |
| Std. Deviation                                  | 1.421    | 1.003  | 0.9867   | 0.6591   | 1.261    |
| Std. Error of Mean                              | 0.5801   | 0.4486 | 0.4028   | 0.2691   | 0.5148   |
| Lower 95% CI                                    | 12.05    | 11.86  | 12.18    | 13.14    | 13.73    |
| Upper 95% CI                                    | 15.03    | 14.35  | 14.25    | 14.52    | 16.38    |

| <b>Propranolol – Average blood flow - 1h</b>      |          |          |         |          |          |
|---------------------------------------------------|----------|----------|---------|----------|----------|
| Treatment ( $\mu\text{M}$ )                       | Ctrl     | 16       | 32      | 64       | 125      |
| Number of values                                  | 6        | 5        | 4       | 6        | 6        |
| Minimum                                           | 0.13     | 0.09     | 0.13    | 0.11     | 0.16     |
| 25% Percentile                                    | 0.1375   | 0.12     | 0.14    | 0.1325   | 0.16     |
| Median                                            | 0.165    | 0.16     | 0.175   | 0.16     | 0.19     |
| 75% Percentile                                    | 0.1825   | 0.19     | 0.1875  | 0.2125   | 0.24     |
| Maximum                                           | 0.19     | 0.22     | 0.19    | 0.28     | 0.27     |
| Mean                                              | 0.1617   | 0.156    | 0.1675  | 0.1733   | 0.2      |
| Std. Deviation                                    | 0.02317  | 0.04615  | 0.0263  | 0.05888  | 0.04472  |
| Std. Error of Mean                                | 0.009458 | 0.02064  | 0.01315 | 0.02404  | 0.01826  |
| Lower 95% CI                                      | 0.1374   | 0.09869  | 0.1257  | 0.1115   | 0.1531   |
| Upper 95% CI                                      | 0.186    | 0.2133   | 0.2093  | 0.2351   | 0.2469   |
| <b>Propranolol – Linear blood flow - 1h</b>       |          |          |         |          |          |
| Treatment ( $\mu\text{M}$ )                       | Ctrl     | 16       | 32      | 64       | 125      |
| Number of values                                  | 6        | 5        | 4       | 6        | 6        |
| Minimum                                           | 773.1    | 554.2    | 683.5   | 666.3    | 857.6    |
| 25% Percentile                                    | 812.8    | 714      | 710.3   | 797.3    | 920.5    |
| Median                                            | 963      | 979.9    | 924.1   | 905      | 1034     |
| 75% Percentile                                    | 1017     | 1135     | 1083    | 1039     | 1125     |
| Maximum                                           | 1086     | 1189     | 1091    | 1110     | 1172     |
| Mean                                              | 934.1    | 935.4    | 905.7   | 907      | 1024     |
| Std. Deviation                                    | 115.6    | 243.1    | 200     | 152.7    | 114.6    |
| Std. Error of Mean                                | 47.2     | 108.7    | 100     | 62.33    | 46.77    |
| Lower 95% CI                                      | 812.8    | 633.6    | 587.5   | 746.8    | 904.2    |
| Upper 95% CI                                      | 1055     | 1237     | 1224    | 1067     | 1145     |
| <b>Propranolol – Surrogate Stroke Volume - 1h</b> |          |          |         |          |          |
| Treatment ( $\mu\text{M}$ )                       | Ctrl     | 16       | 32      | 64       | 125      |
| Number of values                                  | 6        | 5        | 5       | 6        | 6        |
| Minimum                                           | 0.03     | 0.03     | 0.04    | 0.04     | 0.04     |
| 25% Percentile                                    | 0.0375   | 0.035    | 0.045   | 0.04467  | 0.0625   |
| Median                                            | 0.045    | 0.05     | 0.06    | 0.05     | 0.09     |
| 75% Percentile                                    | 0.06     | 0.055    | 0.06    | 0.0675   | 0.1      |
| Maximum                                           | 0.06     | 0.06     | 0.06    | 0.09     | 0.1      |
| Mean                                              | 0.04667  | 0.046    | 0.055   | 0.05604  | 0.08167  |
| Std. Deviation                                    | 0.01211  | 0.0114   | 0.01    | 0.01786  | 0.02317  |
| Std. Error of Mean                                | 0.004944 | 0.005099 | 0.005   | 0.007293 | 0.009458 |
| Lower 95% CI                                      | 0.03396  | 0.03184  | 0.03909 | 0.03729  | 0.05736  |
| Upper 95% CI                                      | 0.05938  | 0.06016  | 0.07091 | 0.07478  | 0.106    |

**Supplementary Table 2.** Descriptive statistics of seven zebrafish cardiovascular endpoints quantified by in vivo imaging after 48h exposure to propranolol.

| <b>Propranolol – Atrium beat rate - 48h</b>      |        |        |        |         |         |
|--------------------------------------------------|--------|--------|--------|---------|---------|
| Treatment ( $\mu$ M)                             | Ctrl   | 16     | 32     | 64      | 125     |
| Number of values                                 | 6      | 6      | 4      | 6       | 5       |
| Minimum                                          | 223.5  | 160.6  | 160.9  | 158.7   | 98.6    |
| 25% Percentile                                   | 229.5  | 171.3  | 161.1  | 159.5   | 111.1   |
| Median                                           | 238.8  | 182.9  | 169.3  | 169.1   | 142.9   |
| 75% Percentile                                   | 250.2  | 213    | 196.2  | 192.2   | 171.8   |
| Maximum                                          | 256.7  | 219.3  | 202.6  | 216.7   | 173.1   |
| Mean                                             | 239.5  | 188.6  | 175.5  | 176.2   | 141.7   |
| Std. Deviation                                   | 12     | 22.32  | 19.55  | 21.85   | 31.65   |
| Std. Error of Mean                               | 4.9    | 9.112  | 9.773  | 8.92    | 14.15   |
| Lower 95% CI                                     | 226.9  | 165.1  | 144.4  | 153.3   | 102.4   |
| Upper 95% CI                                     | 252.1  | 212    | 206.6  | 199.1   | 181     |
| <b>Propranolol – Ventriculum beat rate - 48h</b> |        |        |        |         |         |
| Treatment ( $\mu$ M)                             | Ctrl   | 16     | 32     | 64      | 125     |
| Number of values                                 | 6      | 6      | 4      | 6       | 5       |
| Minimum                                          | 223.4  | 161.2  | 160.9  | 154.3   | 99.1    |
| 25% Percentile                                   | 229.4  | 171.3  | 161.4  | 158.4   | 108.1   |
| Median                                           | 238.8  | 182.1  | 170    | 164.3   | 129.9   |
| 75% Percentile                                   | 250.1  | 212.8  | 195.9  | 172.1   | 171.7   |
| Maximum                                          | 256.8  | 219.6  | 202.1  | 184.9   | 173     |
| Mean                                             | 239.5  | 188.4  | 175.7  | 165.9   | 137.9   |
| Std. Deviation                                   | 12.05  | 22.29  | 19.01  | 10.46   | 32.75   |
| Std. Error of Mean                               | 4.92   | 9.1    | 9.506  | 4.269   | 14.65   |
| Lower 95% CI                                     | 226.9  | 165    | 145.5  | 154.9   | 97.24   |
| Upper 95% CI                                     | 252.2  | 211.7  | 206    | 176.9   | 178.6   |
| <b>Propranolol – A:V beat ratio - 48h</b>        |        |        |        |         |         |
| Treatment ( $\mu$ M)                             | Ctrl   | 16     | 32     | 64      | 125     |
| Number of values                                 | 6      | 6      | 4      | 6       | 5       |
| Minimum                                          | 1      | 1      | 0.99   | 0.97    | 0.99    |
| 25% Percentile                                   | 1      | 1      | 0.9925 | 0.985   | 0.995   |
| Median                                           | 1      | 1      | 1      | 1       | 1       |
| 75% Percentile                                   | 1      | 1      | 1      | 1.125   | 1.08    |
| Maximum                                          | 1      | 1      | 1      | 1.41    | 1.1     |
| Mean                                             | 1      | 1      | 0.9975 | 1.067   | 1.03    |
| Std. Deviation                                   | 0      | 0      | 0.005  | 0.1693  | 0.04796 |
| Std. Error of Mean                               | 0      | 0      | 0.0025 | 0.06912 | 0.02145 |
| Lower 95% CI                                     | 1      | 1      | 0.9895 | 0.889   | 0.9705  |
| Upper 95% CI                                     | 1      | 1      | 1.005  | 1.244   | 1.09    |
| <b>Propranolol – Dorsal Aorta Diameter - 48h</b> |        |        |        |         |         |
| Treatment ( $\mu$ M)                             | Ctrl   | 16     | 32     | 64      | 125     |
| Number of values                                 | 6      | 6      | 6      | 6       | 5       |
| Minimum                                          | 13.1   | 12.6   | 12.2   | 11.6    | 11.1    |
| 25% Percentile                                   | 13.1   | 13.05  | 12.58  | 11.98   | 11.35   |
| Median                                           | 13.5   | 13.6   | 13.65  | 13.3    | 12.4    |
| 75% Percentile                                   | 14     | 13.85  | 14.33  | 14.85   | 13.35   |
| Maximum                                          | 14.3   | 14     | 15     | 15.3    | 13.5    |
| Mean                                             | 13.57  | 13.47  | 13.55  | 13.38   | 12.36   |
| Std. Deviation                                   | 0.5317 | 0.5046 | 1.001  | 1.432   | 1.021   |
| Std. Error of Mean                               | 0.2171 | 0.206  | 0.4089 | 0.5845  | 0.4567  |
| Lower 95% CI                                     | 13.01  | 12.94  | 12.5   | 11.88   | 11.09   |
| Upper 95% CI                                     | 14.12  | 14     | 14.6   | 14.89   | 13.63   |

| <b>Propranolol – Average blood flow - 48h</b>      |          |          |         |          |         |
|----------------------------------------------------|----------|----------|---------|----------|---------|
| Treatment ( $\mu\text{M}$ )                        | Ctrl     | 16       | 32      | 64       | 125     |
| Number of values                                   | 6        | 6        | 6       | 6        | 5       |
| Minimum                                            | 0.2      | 0.1      | 0.1     | 0.1      | 0.1     |
| 25% Percentile                                     | 0.2      | 0.1      | 0.175   | 0.1      | 0.1     |
| Median                                             | 0.2      | 0.15     | 0.2     | 0.2      | 0.1     |
| 75% Percentile                                     | 0.3      | 0.2      | 0.225   | 0.2      | 0.15    |
| Maximum                                            | 0.3      | 0.2      | 0.3     | 0.2      | 0.2     |
| Mean                                               | 0.2333   | 0.15     | 0.2     | 0.1667   | 0.12    |
| Std. Deviation                                     | 0.05164  | 0.05477  | 0.06325 | 0.05164  | 0.04472 |
| Std. Error of Mean                                 | 0.02108  | 0.02236  | 0.02582 | 0.02108  | 0.02    |
| Lower 95% CI                                       | 0.1791   | 0.09252  | 0.1336  | 0.1125   | 0.06447 |
| Upper 95% CI                                       | 0.2875   | 0.2075   | 0.2664  | 0.2209   | 0.1755  |
| <b>Propranolol – Linear blood flow - 48h</b>       |          |          |         |          |         |
| Treatment ( $\mu\text{M}$ )                        | Ctrl     | 16       | 32      | 64       | 125     |
| Number of values                                   | 6        | 6        | 6       | 6        | 5       |
| Minimum                                            | 983      | 461.5    | 951.5   | 583.2    | 568.7   |
| 25% Percentile                                     | 1067     | 486.9    | 962.6   | 743.7    | 646.8   |
| Median                                             | 1172     | 905.6    | 1049    | 955      | 878.3   |
| 75% Percentile                                     | 1217     | 1192     | 1078    | 1020     | 999.9   |
| Maximum                                            | 1252     | 1214     | 1098    | 1052     | 1062    |
| Mean                                               | 1147     | 861.2    | 1031    | 891.9    | 834.3   |
| Std. Deviation                                     | 95.52    | 326.2    | 59.45   | 176.9    | 191.7   |
| Std. Error of Mean                                 | 38.99    | 133.2    | 24.27   | 72.22    | 85.73   |
| Lower 95% CI                                       | 1046     | 518.8    | 968.5   | 706.2    | 596.3   |
| Upper 95% CI                                       | 1247     | 1204     | 1093    | 1078     | 1072    |
| <b>Propranolol – Surrogate Stroke Volume - 48h</b> |          |          |         |          |         |
| Treatment ( $\mu\text{M}$ )                        | Ctrl     | 16       | 32      | 64       | 125     |
| Number of values                                   | 6        | 6        | 5       | 6        | 4       |
| Minimum                                            | 0.04     | 0.03     | 0.05    | 0.04     | 0.02    |
| 25% Percentile                                     | 0.04     | 0.03     | 0.0525  | 0.0475   | 0.025   |
| Median                                             | 0.045    | 0.04     | 0.06    | 0.055    | 0.055   |
| 75% Percentile                                     | 0.075    | 0.0625   | 0.06    | 0.065    | 0.07    |
| Maximum                                            | 0.09     | 0.07     | 0.06    | 0.08     | 0.07    |
| Mean                                               | 0.055    | 0.045    | 0.0575  | 0.05667  | 0.05    |
| Std. Deviation                                     | 0.02074  | 0.01761  | 0.005   | 0.01366  | 0.02449 |
| Std. Error of Mean                                 | 0.008466 | 0.007188 | 0.0025  | 0.005578 | 0.01225 |
| Lower 95% CI                                       | 0.03324  | 0.02652  | 0.04954 | 0.04233  | 0.01102 |
| Upper 95% CI                                       | 0.07676  | 0.06348  | 0.06546 | 0.071    | 0.08898 |

**Supplementary Table 3.** Descriptive statistics of seven zebrafish cardiovascular endpoints quantified by in vivo imaging after 1h exposure to losartan.

| <b>Losartan – Atrium beat rate - 1h</b>      |        |          |        |         |        |
|----------------------------------------------|--------|----------|--------|---------|--------|
| Treatment (mM)                               | Ctrl   | 16       | 32     | 64      | 125    |
| Number of values                             | 6      | 6        | 5      | 5       | 5      |
| Minimum                                      | 239.7  | 226.3    | 247.3  | 236     | 230.7  |
| 25% Percentile                               | 241.8  | 228.3    | 251.5  | 236.2   | 231.8  |
| Median                                       | 243.2  | 251.3    | 259.8  | 247.9   | 235    |
| 75% Percentile                               | 247.8  | 264      | 265.3  | 259.3   | 258.1  |
| Maximum                                      | 253.9  | 267      | 265.9  | 268.5   | 261.8  |
| Mean                                         | 244.7  | 248      | 258.7  | 247.7   | 242.9  |
| Std. Deviation                               | 4.920  | 17.43    | 7.53   | 13.27   | 14.17  |
| Std. Error of Mean                           | 2.009  | 7.116    | 3.368  | 5.936   | 6.335  |
| Lower 95% CI                                 | 239.5  | 229.7    | 249.3  | 231.3   | 225.4  |
| Upper 95% CI                                 | 249.9  | 266.3    | 268    | 264.2   | 260.5  |
| <b>Losartan – Ventriculum beat rate - 1h</b> |        |          |        |         |        |
| Treatment (mM)                               | Ctrl   | 16       | 32     | 64      | 125    |
| Number of values                             | 6      | 6        | 5      | 5       | 5      |
| Minimum                                      | 239.7  | 224.9    | 247.2  | 236.1   | 230.5  |
| 25% Percentile                               | 241.3  | 228      | 251.5  | 236.2   | 231.8  |
| Median                                       | 242.1  | 251.3    | 259.8  | 250     | 235.9  |
| 75% Percentile                               | 248.4  | 264.1    | 265.3  | 261.9   | 258.4  |
| Maximum                                      | 254.2  | 267.1    | 265.9  | 268.4   | 261.7  |
| Mean                                         | 244.4  | 247.8    | 258.7  | 249.2   | 243.3  |
| Std. Deviation                               | 5.279  | 17.81    | 7.588  | 13.65   | 14.15  |
| Std. Error of Mean                           | 2.155  | 7.272    | 3.393  | 6.106   | 6.326  |
| Lower 95% CI                                 | 238.9  | 229.1    | 249.2  | 232.3   | 225.7  |
| Upper 95% CI                                 | 249.9  | 266.5    | 268.1  | 266.2   | 260.8  |
| <b>Losartan – A:V beat ratio - 1h</b>        |        |          |        |         |        |
| Treatment (mM)                               | Ctrl   | 16       | 32     | 64      | 125    |
| Number of values                             | 6      | 6        | 5      | 5       | 5      |
| Minimum                                      | 0.980  | 1        | 1      | 0.97    | 1      |
| 25% Percentile                               | 0.995  | 1        | 1      | 0.9925  | 1      |
| Median                                       | 1      | 1        | 1      | 1       | 1      |
| 75% Percentile                               | 1.013  | 1.003    | 1      | 1       | 1      |
| Maximum                                      | 1.020  | 1.01     | 1      | 1       | 1      |
| Mean                                         | 1.002  | 1.002    | 1      | 0.995   | 1      |
| Std. Deviation                               | 0.004  | 0.004082 | 0      | 0.01225 | 0      |
| Std. Error of Mean                           | 0.005  | 0.001667 | 0      | 0.005   | 0      |
| Lower 95% CI                                 | 0.9836 | 0.9974   | 1      | 0.9821  | 1      |
| Upper 95% CI                                 | 1.02   | 1.006    | 1      | 1.008   | 1      |
| <b>Losartan – Dorsal Aorta Diameter - 1h</b> |        |          |        |         |        |
| Treatment (mM)                               | Ctrl   | 16       | 32     | 64      | 125    |
| Number of values                             | 5      | 6        | 6      | 5       | 5      |
| Minimum                                      | 11.21  | 12.96    | 13.32  | 12.18   | 13.4   |
| 25% Percentile                               | 11.84  | 13.08    | 13.32  | 12.59   | 13.48  |
| Median                                       | 14.14  | 13.91    | 14.62  | 14.45   | 14.25  |
| 75% Percentile                               | 14.48  | 14.7     | 15.11  | 15.47   | 14.66  |
| Maximum                                      | 14.49  | 16.52    | 15.31  | 15.97   | 14.81  |
| Mean                                         | 13.36  | 14.09    | 14.37  | 14.11   | 14.1   |
| Std. Deviation                               | 1.46   | 1.284    | 0.8671 | 1.522   | 0.6111 |
| Std. Error of Mean                           | 0.6531 | 0.5243   | 0.354  | 0.6808  | 0.2733 |
| Lower 95% CI                                 | 11.54  | 12.74    | 13.46  | 12.22   | 13.35  |
| Upper 95% CI                                 | 15.17  | 15.43    | 15.28  | 16      | 14.86  |

| <b>Losartan – Average blood flow - 1h</b>      |          |          |          |         |          |
|------------------------------------------------|----------|----------|----------|---------|----------|
| Treatment (mM)                                 | Ctrl     | 16       | 32       | 64      | 125      |
| Number of values                               | 5        | 6        | 6        | 5       | 5        |
| Minimum                                        | 0.13     | 0.16     | 0.17     | 0.19    | 0.15     |
| 25% Percentile                                 | 0.14     | 0.1675   | 0.1925   | 0.19    | 0.17     |
| Median                                         | 0.17     | 0.175    | 0.205    | 0.22    | 0.19     |
| 75% Percentile                                 | 0.215    | 0.2525   | 0.23     | 0.370   | 0.225    |
| Maximum                                        | 0.25     | 0.29     | 0.26     | 0.42    | 0.23     |
| Mean                                           | 0.176    | 0.2017   | 0.21     | 0.268   | 0.196    |
| Std. Deviation                                 | 0.04561  | 0.05193  | 0.02966  | 0.1003  | 0.0313   |
| Std. Error of Mean                             | 0.0204   | 0.0212   | 0.01211  | 0.04488 | 0.014    |
| Lower 95% CI                                   | 0.1194   | 0.1472   | 0.1789   | 0.1434  | 0.1571   |
| Upper 95% CI                                   | 0.2326   | 0.2562   | 0.2411   | 0.3926  | 0.2349   |
| <b>Losartan – Linear blood flow - 1h</b>       |          |          |          |         |          |
| Treatment (mM)                                 | Ctrl     | 16       | 32       | 64      | 125      |
| Number of values                               | 5        | 6        | 6        | 5       | 5        |
| Minimum                                        | 854.6    | 870.3    | 834.2    | 932     | 798.1    |
| 25% Percentile                                 | 866.2    | 925.7    | 893.9    | 956.3   | 859.1    |
| Median                                         | 949      | 1058     | 1082     | 1147    | 1021     |
| 75% Percentile                                 | 1028     | 1280     | 1220     | 1260    | 1177     |
| Maximum                                        | 1064     | 1416     | 1346     | 1370    | 1181     |
| Mean                                           | 947.3    | 1097     | 1073     | 1116    | 1018     |
| Std. Deviation                                 | 85.05    | 205.3    | 188.7    | 172.3   | 164.6    |
| Std. Error of Mean                             | 38.04    | 83.8     | 77.03    | 77.05   | 73.63    |
| Lower 95% CI                                   | 841.7    | 881.3    | 874.7    | 902.2   | 814      |
| Upper 95% CI                                   | 1053     | 1312     | 1271     | 1330    | 1223     |
| <b>Losartan – Surrogate Stroke Volume - 1h</b> |          |          |          |         |          |
| Treatment (mM)                                 | Ctrl     | 16       | 32       | 64      | 125      |
| Number of values                               | 5        | 6        | 6        | 5       | 5        |
| Minimum                                        | 0.03     | 0.04     | 0.04     | 0.05    | 0.04     |
| 25% Percentile                                 | 0.035    | 0.04     | 0.045    | 0.05    | 0.045    |
| Median                                         | 0.04     | 0.045    | 0.05     | 0.05    | 0.05     |
| 75% Percentile                                 | 0.055    | 0.055    | 0.055    | 0.0725  | 0.05     |
| Maximum                                        | 0.06     | 0.07     | 0.06     | 0.08    | 0.05     |
| Mean                                           | 0.044    | 0.04833  | 0.05     | 0.0575  | 0.048    |
| Std. Deviation                                 | 0.0114   | 0.01169  | 0.007071 | 0.015   | 0.004472 |
| Std. Error of Mean                             | 0.005099 | 0.004773 | 0.003162 | 0.0075  | 0.002    |
| Lower 95% CI                                   | 0.02984  | 0.03606  | 0.04122  | 0.03363 | 0.04245  |
| Upper 95% CI                                   | 0.05816  | 0.0606   | 0.05878  | 0.08137 | 0.05355  |

**Supplementary Table 4.** Descriptive statistics of seven zebrafish cardiovascular endpoints quantified by in vivo imaging after 48h exposure to losartan.

| <b>Losartan – Atrium beat rate - 48h</b>      |        |         |         |        |        |
|-----------------------------------------------|--------|---------|---------|--------|--------|
| Treatment (mM)                                | Ctrl   | 16      | 32      | 64     | 125    |
| Number of values                              | 6      | 6       | 6       | 6      | 5      |
| Minimum                                       | 235.1  | 219.3   | 236     | 209.1  | 192.1  |
| 25% Percentile                                | 239.9  | 221     | 237.4   | 218.6  | 197.5  |
| Median                                        | 243.8  | 231.1   | 238.2   | 229.2  | 205.5  |
| 75% Percentile                                | 264.7  | 238.9   | 259.1   | 236.5  | 220.7  |
| Maximum                                       | 291.8  | 245.5   | 260.2   | 254.8  | 227    |
| Mean                                          | 251.9  | 230.9   | 244.9   | 229.1  | 208.4  |
| Std. Deviation                                | 20.68  | 10.15   | 11.35   | 14.95  | 13.08  |
| Std. Error of Mean                            | 8.442  | 4.143   | 4.633   | 6.104  | 5.852  |
| Lower 95% CI                                  | 230.2  | 220.2   | 232.9   | 213.4  | 192.1  |
| Upper 95% CI                                  | 273.6  | 241.5   | 256.8   | 244.8  | 224.6  |
| <b>Losartan – Ventriculum beat rate - 48h</b> |        |         |         |        |        |
| Treatment (mM)                                | Ctrl   | 16      | 32      | 64     | 125    |
| Number of values                              | 6      | 6       | 6       | 6      | 5      |
| Minimum                                       | 234.9  | 216.1   | 231.4   | 209.2  | 192.1  |
| 25% Percentile                                | 239.9  | 220.2   | 235.5   | 218.7  | 197.6  |
| Median                                        | 243.7  | 231.6   | 237.9   | 229.3  | 205.5  |
| 75% Percentile                                | 264.8  | 248.1   | 259.1   | 236.6  | 220.7  |
| Maximum                                       | 292    | 255.7   | 260.2   | 255.2  | 227    |
| Mean                                          | 251.9  | 233.7   | 243.8   | 229.2  | 208.4  |
| Std. Deviation                                | 20.8   | 15.13   | 12.34   | 15.06  | 13.07  |
| Std. Error of Mean                            | 8.491  | 6.176   | 5.04    | 6.148  | 5.847  |
| Lower 95% CI                                  | 230.1  | 217.8   | 230.9   | 213.4  | 192.2  |
| Upper 95% CI                                  | 273.7  | 249.5   | 256.8   | 245    | 224.6  |
| <b>Losartan – A:V beat ratio - 48h</b>        |        |         |         |        |        |
| Treatment (mM)                                | Ctrl   | 16      | 32      | 64     | 125    |
| Number of values                              | 6      | 6       | 6       | 6      | 5      |
| Minimum                                       | 1      | 0.92    | 1       | 1      | 1      |
| 25% Percentile                                | 1      | 0.98    | 1       | 1      | 1      |
| Median                                        | 1      | 1       | 1       | 1      | 1      |
| 75% Percentile                                | 1      | 1.003   | 1.008   | 1      | 1      |
| Maximum                                       | 1      | 1.01    | 1.03    | 1      | 1      |
| Mean                                          | 1      | 0.9883  | 1.005   | 1      | 1      |
| Std. Deviation                                | 0      | 0.03371 | 0.01225 | 0      | 0      |
| Std. Error of Mean                            | 0      | 0.01376 | 0.005   | 0      | 0      |
| Lower 95% CI                                  | 1      | 0.953   | 0.9921  | 1      | 1      |
| Upper 95% CI                                  | 1      | 1.024   | 1.018   | 1      | 1      |
| <b>Losartan – Dorsal Aorta Diameter - 48h</b> |        |         |         |        |        |
| Treatment (mM)                                | Ctrl   | 16      | 32      | 64     | 125    |
| Number of values                              | 6      | 6       | 6       | 6      | 4      |
| Minimum                                       | 10.91  | 11.34   | 11.84   | 11.28  | 11.96  |
| 25% Percentile                                | 11.53  | 11.57   | 11.89   | 11.67  | 12     |
| Median                                        | 12.08  | 12.2    | 12.42   | 13.39  | 12.76  |
| 75% Percentile                                | 12.83  | 12.57   | 13.85   | 14.41  | 13.74  |
| Maximum                                       | 13.22  | 13.08   | 15.66   | 14.5   | 13.85  |
| Mean                                          | 12.12  | 12.14   | 12.92   | 13.12  | 12.83  |
| Std. Deviation                                | 0.7959 | 0.6147  | 1.471   | 1.325  | 0.9328 |
| Std. Error of Mean                            | 0.3249 | 0.251   | 0.6005  | 0.5411 | 0.4664 |
| Lower 95% CI                                  | 11.28  | 11.5    | 11.37   | 11.73  | 11.35  |
| Upper 95% CI                                  | 12.96  | 12.79   | 14.46   | 14.51  | 14.32  |



| <b>Losartan – Average blood flow - 48h</b>      |          |          |          |          |          |
|-------------------------------------------------|----------|----------|----------|----------|----------|
| Treatment (mM)                                  | Ctrl     | 16       | 32       | 64       | 125      |
| Number of values                                | 6        | 6        | 6        | 6        | 5        |
| Minimum                                         | 0.22     | 0.26     | 0.14     | 0.17     | 0.21     |
| 25% Percentile                                  | 0.22     | 0.275    | 0.2      | 0.2      | 0.225    |
| Median                                          | 0.25     | 0.295    | 0.275    | 0.235    | 0.28     |
| 75% Percentile                                  | 0.32     | 0.4      | 0.3075   | 0.265    | 0.335    |
| Maximum                                         | 0.32     | 0.43     | 0.33     | 0.28     | 0.37     |
| Mean                                            | 0.2633   | 0.325    | 0.2567   | 0.2317   | 0.28     |
| Std. Deviation                                  | 0.04633  | 0.06892  | 0.06772  | 0.03971  | 0.06124  |
| Std. Error of Mean                              | 0.01892  | 0.02814  | 0.02765  | 0.01621  | 0.02739  |
| Lower 95% CI                                    | 0.2147   | 0.2527   | 0.1856   | 0.19     | 0.204    |
| Upper 95% CI                                    | 0.312    | 0.3973   | 0.3277   | 0.2733   | 0.356    |
| <b>Losartan – Linear blood flow - 48h</b>       |          |          |          |          |          |
| Treatment (mM)                                  | Ctrl     | 16       | 32       | 64       | 125      |
| Number of values                                | 6        | 6        | 6        | 6        | 5        |
| Minimum                                         | 1295     | 1354     | 1112     | 1068     | 1207     |
| 25% Percentile                                  | 1355     | 1428     | 1193     | 1109     | 1233     |
| Median                                          | 1449     | 1620     | 1521     | 1247     | 1337     |
| 75% Percentile                                  | 1551     | 1731     | 1613     | 1314     | 1436     |
| Maximum                                         | 1562     | 1740     | 1724     | 1398     | 1462     |
| Mean                                            | 1446     | 1586     | 1446     | 1228     | 1335     |
| Std. Deviation                                  | 112      | 153.8    | 232.5    | 118.1    | 104.9    |
| Std. Error of Mean                              | 45.7     | 62.8     | 94.9     | 48.21    | 46.93    |
| Lower 95% CI                                    | 1329     | 1425     | 1202     | 1104     | 1205     |
| Upper 95% CI                                    | 1564     | 1747     | 1690     | 1352     | 1465     |
| <b>Losartan – Surrogate Stroke Volume - 48h</b> |          |          |          |          |          |
| Treatment (mM)                                  | Ctrl     | 16       | 32       | 64       | 125      |
| Number of values                                | 6        | 6        | 6        | 6        | 5        |
| Minimum                                         | 0.05     | 0.07     | 0.04     | 0.04     | 0.06     |
| 25% Percentile                                  | 0.05     | 0.07     | 0.0475   | 0.0475   | 0.065    |
| Median                                          | 0.06     | 0.08     | 0.07     | 0.06     | 0.08     |
| 75% Percentile                                  | 0.0725   | 0.1      | 0.0725   | 0.0725   | 0.095    |
| Maximum                                         | 0.08     | 0.1      | 0.08     | 0.08     | 0.11     |
| Mean                                            | 0.06167  | 0.08333  | 0.06333  | 0.06     | 0.08     |
| Std. Deviation                                  | 0.01169  | 0.01366  | 0.01506  | 0.01414  | 0.01871  |
| Std. Error of Mean                              | 0.004773 | 0.005578 | 0.006146 | 0.005774 | 0.008367 |
| Lower 95% CI                                    | 0.0494   | 0.069    | 0.04753  | 0.04516  | 0.05677  |
| Upper 95% CI                                    | 0.07394  | 0.09767  | 0.07913  | 0.07484  | 0.1032   |

**Supplementary Table 5.** Descriptive statistics of seven zebrafish cardiovascular endpoints quantified by in vivo imaging after 1h exposure to captopril.

| <b>Captopril – Atrium beat rate - 1h</b>      |         |        |          |         |          |
|-----------------------------------------------|---------|--------|----------|---------|----------|
| Treatment (mM)                                | Ctrl    | 16     | 32       | 64      | 125      |
| Number of values                              | 6       | 6      | 5        | 5       | 4        |
| Minimum                                       | 219.8   | 209.6  | 220      | 224.8   | 214.2    |
| 25% Percentile                                | 225.1   | 220.5  | 224.5    | 229     | 214.2    |
| Median                                        | 244.7   | 230.9  | 229      | 240.4   | 236.6    |
| 75% Percentile                                | 257.4   | 240.2  | 233.7    | 248.1   | 237.6    |
| Maximum                                       | 261.7   | 255.8  | 237.8    | 249.2   | 237.6    |
| Mean                                          | 242.3   | 231    | 229.1    | 238.9   | 229.5    |
| Std. Deviation                                | 16.23   | 15.2   | 6.301    | 10.08   | 13.23    |
| Std. Error of Mean                            | 6.625   | 6.206  | 2.818    | 4.508   | 7.639    |
| Lower 95% CI                                  | 225.3   | 215.1  | 221.2    | 226.4   | 196.6    |
| Upper 95% CI                                  | 259.3   | 247    | 236.9    | 251.4   | 262.3    |
| <b>Captopril – Ventriculum beat rate - 1h</b> |         |        |          |         |          |
| Treatment (mM)                                | Ctrl    | 16     | 32       | 64      | 125      |
| Number of values                              | 6       | 6      | 5        | 5       | 4        |
| Minimum                                       | 239.6   | 210.1  | 219      | 225.5   | 217.2    |
| 25% Percentile                                | 239.7   | 220.2  | 224      | 229     | 217.2    |
| Median                                        | 244.5   | 230.4  | 229.3    | 240.5   | 238      |
| 75% Percentile                                | 257.5   | 240.2  | 232.9    | 252.2   | 240.5    |
| Maximum                                       | 261.9   | 255.9  | 235.6    | 257.3   | 240.5    |
| Mean                                          | 247.7   | 230.9  | 228.6    | 240.6   | 231.9    |
| Std. Deviation                                | 9.188   | 15.2   | 6        | 12.38   | 12.79    |
| Std. Error of Mean                            | 3.751   | 6.205  | 2.683    | 5.538   | 7.385    |
| Lower 95% CI                                  | 238     | 214.9  | 221.1    | 225.2   | 200.1    |
| Upper 95% CI                                  | 257.3   | 246.8  | 236      | 255.9   | 263.7    |
| <b>Captopril – A:V beat ratio - 1h</b>        |         |        |          |         |          |
| Treatment (mM)                                | Ctrl    | 16     | 32       | 64      | 125      |
| Number of values                              | 6       | 6      | 5        | 5       | 4        |
| Minimum                                       | 0.92    | 1      | 0.99     | 0.97    | 0.98     |
| 25% Percentile                                | 0.9425  | 1      | 0.9975   | 0.9925  | 0.98     |
| Median                                        | 1       | 1      | 1        | 1       | 0.99     |
| 75% Percentile                                | 1       | 1      | 1.003    | 1       | 1        |
| Maximum                                       | 1       | 1      | 1.01     | 1       | 1        |
| Mean                                          | 0.9783  | 1      | 1        | 0.995   | 0.99     |
| Std. Deviation                                | 0.03488 | 0      | 0.006325 | 0.01225 | 0.01     |
| Std. Error of Mean                            | 0.01424 | 0      | 0.002582 | 0.005   | 0.005774 |
| Lower 95% CI                                  | 0.9417  | 1      | 0.9934   | 0.9821  | 0.9652   |
| Upper 95% CI                                  | 1.015   | 1      | 1.007    | 1.008   | 1.015    |
| <b>Captopril – Dorsal Aorta Diameter - 1h</b> |         |        |          |         |          |
| Treatment (mM)                                | Ctrl    | 16     | 32       | 64      | 125      |
| Number of values                              | 6       | 6      | 5        | 4       | 4        |
| Minimum                                       | 13.35   | 13.1   | 12       | 11.39   | 13.79    |
| 25% Percentile                                | 13.51   | 13.34  | 12.22    | 11.84   | 13.9     |
| Median                                        | 13.73   | 13.66  | 13.89    | 13.71   | 15.11    |
| 75% Percentile                                | 14.08   | 16.07  | 15.21    | 14.31   | 16.32    |
| Maximum                                       | 14.35   | 16.29  | 15.86    | 14.33   | 16.42    |
| Mean                                          | 13.79   | 14.35  | 13.75    | 13.29   | 15.11    |
| Std. Deviation                                | 0.3485  | 1.405  | 1.576    | 1.364   | 1.299    |
| Std. Error of Mean                            | 0.1423  | 0.5736 | 0.7047   | 0.6822  | 0.6494   |
| Lower 95% CI                                  | 13.42   | 12.88  | 11.79    | 11.11   | 13.04    |
| Upper 95% CI                                  | 14.15   | 15.83  | 15.7     | 15.46   | 17.17    |

| <b>Captopril – Average blood flow - 1h</b>      |          |          |          |          |          |
|-------------------------------------------------|----------|----------|----------|----------|----------|
| Treatment (mM)                                  | Ctrl     | 16       | 32       | 64       | 125      |
| Number of values                                | 6        | 6        | 5        | 5        | 4        |
| Minimum                                         | 0.16     | 0.1      | 0.09     | 0.08     | 0.12     |
| 25% Percentile                                  | 0.1825   | 0.1      | 0.11     | 0.095    | 0.1275   |
| Median                                          | 0.21     | 0.12     | 0.14     | 0.16     | 0.165    |
| 75% Percentile                                  | 0.255    | 0.1559   | 0.2      | 0.235    | 0.21     |
| Maximum                                         | 0.3      | 0.16     | 0.23     | 0.26     | 0.22     |
| Mean                                            | 0.2183   | 0.1257   | 0.152    | 0.164    | 0.1675   |
| Std. Deviation                                  | 0.04956  | 0.0268   | 0.05215  | 0.07301  | 0.04272  |
| Std. Error of Mean                              | 0.02023  | 0.01094  | 0.02332  | 0.03265  | 0.02136  |
| Lower 95% CI                                    | 0.1663   | 0.09762  | 0.08724  | 0.07335  | 0.09952  |
| Upper 95% CI                                    | 0.2703   | 0.1539   | 0.2168   | 0.2546   | 0.2355   |
| <b>Captopril – Linear blood flow - 1h</b>       |          |          |          |          |          |
| Treatment (mM)                                  | Ctrl     | 16       | 32       | 64       | 125      |
| Number of values                                | 6        | 6        | 5        | 5        | 4        |
| Minimum                                         | 849      | 563.3    | 713.5    | 451.2    | 737      |
| 25% Percentile                                  | 868.7    | 626.9    | 778.5    | 586.4    | 748.4    |
| Median                                          | 1070     | 713.9    | 880.5    | 854.4    | 802.3    |
| 75% Percentile                                  | 1143     | 791      | 1047     | 1209     | 985.4    |
| Maximum                                         | 1206     | 952.4    | 1177     | 1318     | 1040     |
| Mean                                            | 1032     | 721.5    | 906.4    | 889.1    | 845.4    |
| Std. Deviation                                  | 141.3    | 130.5    | 169.7    | 335.2    | 134.3    |
| Std. Error of Mean                              | 57.67    | 53.28    | 75.89    | 149.9    | 67.13    |
| Lower 95% CI                                    | 883.8    | 584.5    | 695.7    | 472.8    | 631.7    |
| Upper 95% CI                                    | 1180     | 858.4    | 1117     | 1305     | 1059     |
| <b>Captopril – Surrogate Stroke Volume - 1h</b> |          |          |          |          |          |
| Treatment (mM)                                  | Ctrl     | 16       | 32       | 64       | 125      |
| Number of values                                | 6        | 6        | 5        | 5        | 4        |
| Minimum                                         | 0.04     | 0.02     | 0.03     | 0.02     | 0.03     |
| 25% Percentile                                  | 0.0475   | 0.0275   | 0.035    | 0.025    | 0.03     |
| Median                                          | 0.055    | 0.03     | 0.04     | 0.04     | 0.05     |
| 75% Percentile                                  | 0.0625   | 0.04029  | 0.05     | 0.055    | 0.05     |
| Maximum                                         | 0.07     | 0.04117  | 0.06     | 0.06     | 0.05     |
| Mean                                            | 0.055    | 0.03186  | 0.042    | 0.04     | 0.04333  |
| Std. Deviation                                  | 0.01049  | 0.007797 | 0.01095  | 0.01581  | 0.01155  |
| Std. Error of Mean                              | 0.004282 | 0.003183 | 0.004899 | 0.007071 | 0.006667 |
| Lower 95% CI                                    | 0.04399  | 0.02368  | 0.0284   | 0.02037  | 0.01465  |
| Upper 95% CI                                    | 0.06601  | 0.04004  | 0.0556   | 0.05963  | 0.07202  |

**Supplementary Table 6.** Descriptive statistics of seven zebrafish cardiovascular endpoints quantified by in vivo imaging after 48h exposure to captopril.

| <b>Captopril – Atrium beat rate - 48h</b>      |          |         |          |          |          |
|------------------------------------------------|----------|---------|----------|----------|----------|
| Treatment (mM)                                 | Ctrl     | 16      | 32       | 64       | 125      |
| Number of values                               | 6        | 5       | 6        | 6        | 6        |
| Minimum                                        | 221.3    | 216.1   | 216.2    | 175.9    | 175.8    |
| 25% Percentile                                 | 234.7    | 219.9   | 219.8    | 205.9    | 197.7    |
| Median                                         | 252.1    | 227.2   | 223.6    | 230.6    | 233.4    |
| 75% Percentile                                 | 259.6    | 235.7   | 230.8    | 244.9    | 248.1    |
| Maximum                                        | 267.5    | 239.3   | 236.9    | 260.5    | 250      |
| Mean                                           | 248.2    | 227.7   | 225      | 225.5    | 224.2    |
| Std. Deviation                                 | 16.21    | 8.74    | 7.229    | 28.42    | 29.05    |
| Std. Error of Mean                             | 6.618    | 3.909   | 2.951    | 11.6     | 11.86    |
| Lower 95% CI                                   | 231.2    | 216.8   | 217.4    | 195.7    | 193.7    |
| Upper 95% CI                                   | 265.2    | 238.5   | 232.6    | 255.3    | 254.7    |
| <b>Captopril – Ventriculum beat rate - 48h</b> |          |         |          |          |          |
| Treatment (mM)                                 | Ctrl     | 16      | 32       | 64       | 125      |
| Number of values                               | 6        | 5       | 6        | 6        | 6        |
| Minimum                                        | 221.2    | 216     | 216.2    | 175.9    | 175.8    |
| 25% Percentile                                 | 234.7    | 219.9   | 219.7    | 205.9    | 197.7    |
| Median                                         | 256.5    | 232.1   | 225.1    | 226.3    | 233.3    |
| 75% Percentile                                 | 260.9    | 245.8   | 234.2    | 245.1    | 249.6    |
| Maximum                                        | 267.6    | 252.3   | 239.7    | 261.4    | 261.4    |
| Mean                                           | 249.9    | 232.7   | 226.6    | 224.3    | 225.7    |
| Std. Deviation                                 | 16.82    | 14.04   | 8.376    | 28.68    | 31.11    |
| Std. Error of Mean                             | 6.869    | 6.277   | 3.42     | 11.71    | 12.7     |
| Lower 95% CI                                   | 232.3    | 215.3   | 217.8    | 194.2    | 193.1    |
| Upper 95% CI                                   | 267.6    | 250.1   | 235.3    | 254.3    | 258.4    |
| <b>Captopril – A:V beat ratio - 48h</b>        |          |         |          |          |          |
| Treatment (mM)                                 | Ctrl     | 16      | 32       | 64       | 125      |
| Number of values                               | 6        | 5       | 6        | 6        | 6        |
| Minimum                                        | 0.96     | 0.9     | 0.95     | 1        | 0.95     |
| 25% Percentile                                 | 0.99     | 0.95    | 0.98     | 1        | 0.9875   |
| Median                                         | 1        | 1       | 1        | 1        | 1        |
| 75% Percentile                                 | 1        | 1       | 1.005    | 1.01     | 1.005    |
| Maximum                                        | 1        | 1       | 1.02     | 1.04     | 1.02     |
| Mean                                           | 0.9933   | 0.98    | 0.9933   | 1.007    | 0.995    |
| Std. Deviation                                 | 0.01633  | 0.04472 | 0.02338  | 0.01633  | 0.02345  |
| Std. Error of Mean                             | 0.006667 | 0.02    | 0.009545 | 0.006667 | 0.009574 |
| Lower 95% CI                                   | 0.9762   | 0.9245  | 0.9688   | 0.9895   | 0.9704   |
| Upper 95% CI                                   | 1.01     | 1.036   | 1.018    | 1.024    | 1.02     |
| <b>Captopril – Dorsal Aorta Diameter - 48h</b> |          |         |          |          |          |
| Treatment (mM)                                 | Ctrl     | 16      | 32       | 64       | 125      |
| Number of values                               | 6        | 5       | 6        | 6        | 6        |
| Minimum                                        | 12.2     | 13.21   | 11.7     | 12.26    | 11.74    |
| 25% Percentile                                 | 12.49    | 13.27   | 12.06    | 12.61    | 13.12    |
| Median                                         | 12.71    | 14.49   | 13.48    | 12.97    | 14.02    |
| 75% Percentile                                 | 13.1     | 15.13   | 15.71    | 14.1     | 16.01    |
| Maximum                                        | 13.98    | 15.54   | 17.67    | 14.73    | 18.83    |
| Mean                                           | 12.83    | 14.26   | 13.93    | 13.26    | 14.54    |
| Std. Deviation                                 | 0.603    | 0.9837  | 2.233    | 0.9019   | 2.377    |
| Std. Error of Mean                             | 0.2462   | 0.4399  | 0.9115   | 0.3682   | 0.9706   |
| Lower 95% CI                                   | 12.2     | 13.04   | 11.58    | 12.31    | 12.05    |
| Upper 95% CI                                   | 13.46    | 15.48   | 16.27    | 14.2     | 17.04    |

| <b>Captopril – Average blood flow - 48h</b>      |          |          |          |          |          |
|--------------------------------------------------|----------|----------|----------|----------|----------|
| Treatment (mM)                                   | Ctrl     | 16       | 32       | 64       | 125      |
| Number of values                                 | 6        | 5        | 6        | 6        | 6        |
| Minimum                                          | 0.15     | 0.15     | 0.14     | 0.09     | 0.18     |
| 25% Percentile                                   | 0.1875   | 0.175    | 0.14     | 0.1275   | 0.1875   |
| Median                                           | 0.28     | 0.2      | 0.165    | 0.165    | 0.215    |
| 75% Percentile                                   | 0.3225   | 0.255    | 0.215    | 0.2475   | 0.25     |
| Maximum                                          | 0.36     | 0.28     | 0.29     | 0.3      | 0.28     |
| Mean                                             | 0.2633   | 0.212    | 0.1817   | 0.1817   | 0.22     |
| Std. Deviation                                   | 0.07633  | 0.04764  | 0.05636  | 0.0736   | 0.03742  |
| Std. Error of Mean                               | 0.03116  | 0.02131  | 0.02301  | 0.03005  | 0.01528  |
| Lower 95% CI                                     | 0.1832   | 0.1528   | 0.1225   | 0.1044   | 0.1807   |
| Upper 95% CI                                     | 0.3434   | 0.2712   | 0.2408   | 0.2589   | 0.2593   |
| <b>Captopril – Linear blood flow - 48h</b>       |          |          |          |          |          |
| Treatment (mM)                                   | Ctrl     | 16       | 32       | 64       | 125      |
| Number of values                                 | 6        | 5        | 6        | 6        | 6        |
| Minimum                                          | 1010     | 870.2    | 693      | 725.3    | 822      |
| 25% Percentile                                   | 1299     | 888.4    | 868.7    | 799.1    | 842.9    |
| Median                                           | 1454     | 1042     | 987.4    | 1011     | 896.6    |
| 75% Percentile                                   | 1581     | 1251     | 1263     | 1176     | 1077     |
| Maximum                                          | 1622     | 1348     | 1385     | 1290     | 1282     |
| Mean                                             | 1417     | 1064     | 1034     | 999.8    | 959.2    |
| Std. Deviation                                   | 215.8    | 194.5    | 243.2    | 205.6    | 172.3    |
| Std. Error of Mean                               | 88.11    | 86.99    | 99.29    | 83.95    | 70.33    |
| Lower 95% CI                                     | 1190     | 822.7    | 778.4    | 784      | 778.4    |
| Upper 95% CI                                     | 1643     | 1306     | 1289     | 1216     | 1140     |
| <b>Captopril – Surrogate Stroke Volume - 48h</b> |          |          |          |          |          |
| Treatment (mM)                                   | Ctrl     | 16       | 32       | 64       | 125      |
| Number of values                                 | 6        | 5        | 6        | 6        | 6        |
| Minimum                                          | 0.04     | 0.04     | 0.04     | 0.02     | 0.04     |
| 25% Percentile                                   | 0.04     | 0.045    | 0.04     | 0.035    | 0.0475   |
| Median                                           | 0.07     | 0.05     | 0.04     | 0.05     | 0.055    |
| 75% Percentile                                   | 0.0725   | 0.065    | 0.055    | 0.065    | 0.07     |
| Maximum                                          | 0.08     | 0.07     | 0.07     | 0.08     | 0.1      |
| Mean                                             | 0.06167  | 0.054    | 0.04667  | 0.05     | 0.06     |
| Std. Deviation                                   | 0.01722  | 0.0114   | 0.01211  | 0.02     | 0.02098  |
| Std. Error of Mean                               | 0.007032 | 0.005099 | 0.004944 | 0.008165 | 0.008563 |
| Lower 95% CI                                     | 0.04359  | 0.03984  | 0.03396  | 0.02901  | 0.03799  |
| Upper 95% CI                                     | 0.07974  | 0.06816  | 0.05938  | 0.07099  | 0.08201  |

**Supplementary Table 7.** The zebrafish cardiovascular assay described in this study was performed using a sample size equal to 6 fish per treatment group. This table displays the estimated minimum effect size (%) (i.e. the minimum difference between two groups) detected with  $n=6$  for each drug/endpoint/time combination. These values were calculated using endpoint-specific mean and standard deviation observed in the control populations (Column 1-6), with acceptable power set at 0.80 and significance level (alpha) set at 0.05 (two-sided test). As term of comparison, Column 7 displays the estimated effect size detected with  $n=6$  calculated using data retrieved from Parker et al. (2014).

|          |                | Estimated minimum effect size (%) detected with $n=6$ (power=0.80, alpha=0.05) |           |           |            |            |            |                       |
|----------|----------------|--------------------------------------------------------------------------------|-----------|-----------|------------|------------|------------|-----------------------|
|          |                | 1                                                                              | 2         | 3         | 4          | 5          | 6          | 7                     |
|          |                | PRO<br>1h                                                                      | LOS<br>1h | CAP<br>1h | PRO<br>48h | LOS<br>48h | CAP<br>48h | Parker et al.<br>2014 |
| Endpoint | ABR            | 13                                                                             | 4         | 12        | 9          | 15         | 12         | 11                    |
|          | VBR            | 13                                                                             | 4         | 7         | 9          | 15         | 12         | 13                    |
|          | A:V beat ratio | 1.8                                                                            | 0.9       | 7         | 1          | 1          | 3          | 10                    |
|          | DA diameter    | 19                                                                             | 20        | 5         | 8          | 12         | 9          | 24                    |
|          | DA average BF  | 26                                                                             | 47        | 42        | 40         | 32         | 52         | 22                    |
|          | DA linear BF   | 23                                                                             | 18        | 25        | 20         | 14         | 25         | n/a                   |
|          | SSV            | 47                                                                             | 47        | 35        | 7          | 35         | 28         | 43                    |

*PRO: propranolol; LOS: losartan; CAP: captopril; 1h: 1 hour exposure; 48h: 48 hours exposure; ABR: atrial beat rate per minute; VBR: ventricular beat rate per minute; A:V: atrium:ventriculum; DA: dorsal aorta; BF: blood flow; SSV: surrogate stroke volume.*

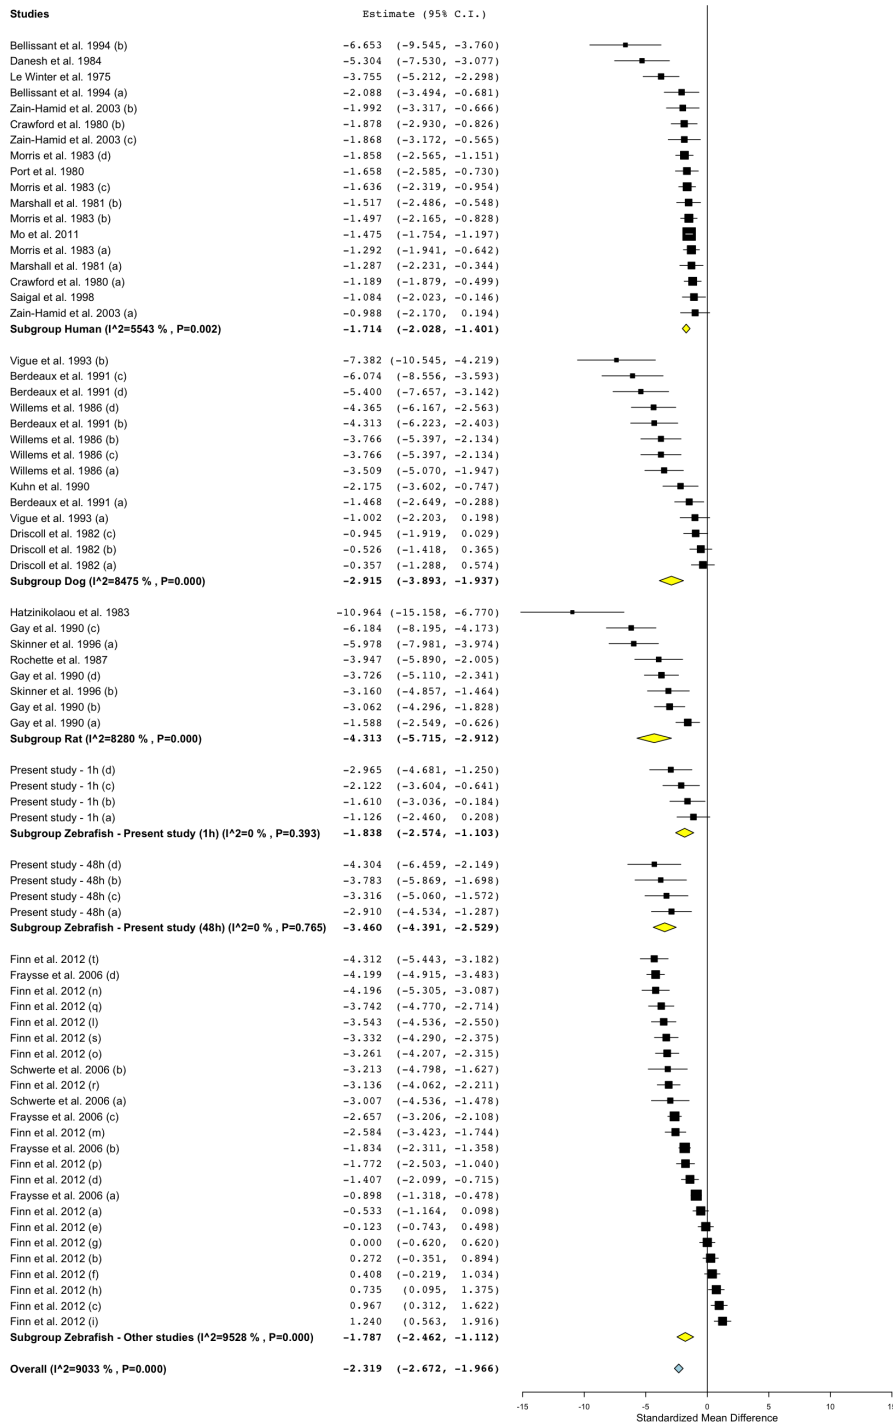

**Supplementary Figure 1.** Meta-analysis of the effects of propranolol on heart-rate in zebrafish, rat, dog, and humans.

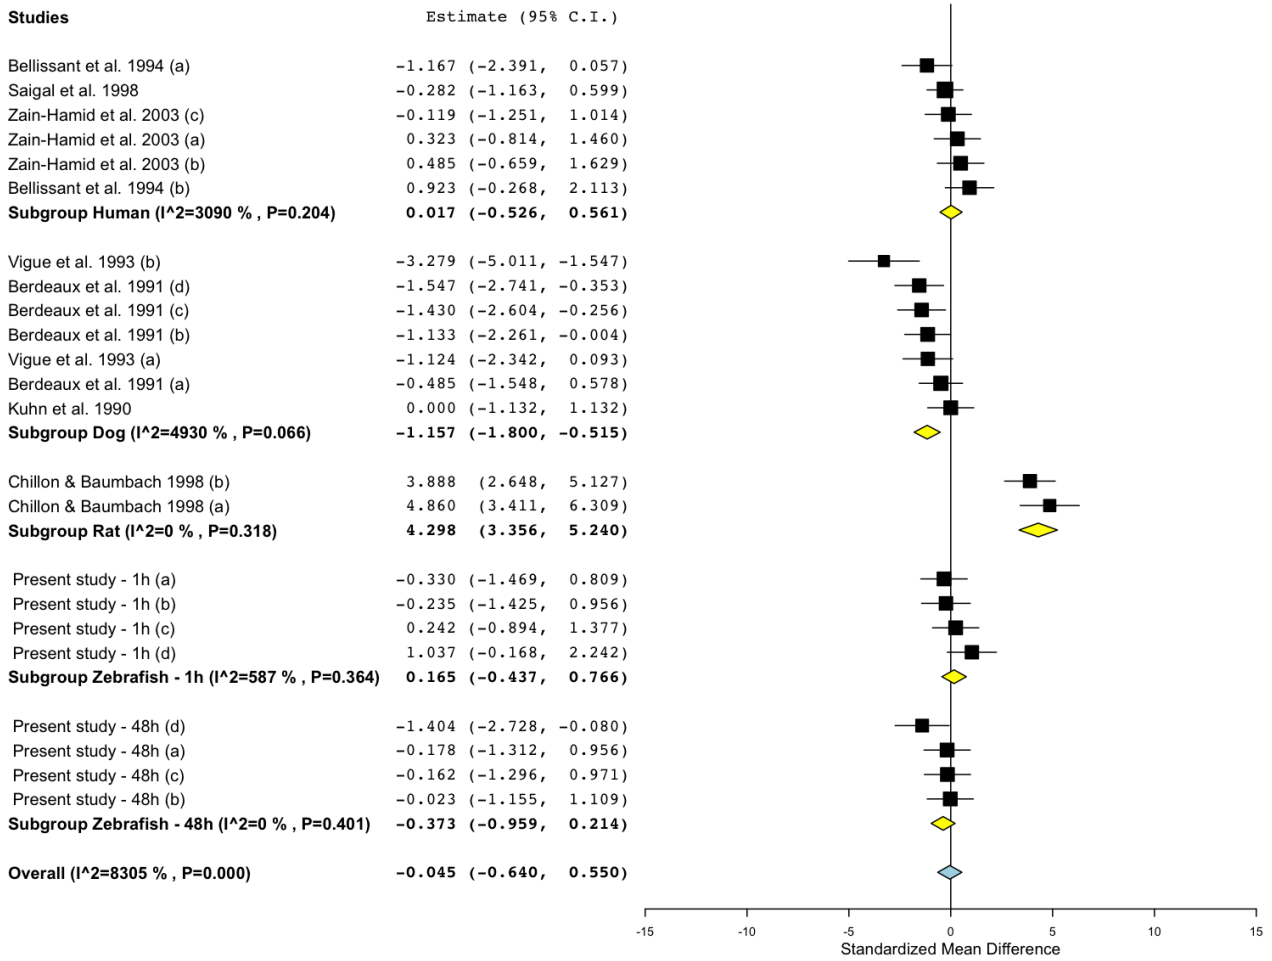

**Supplementary Figure 2.** Meta-analysis of the effects of propranolol on vessel diameter in zebrafish, rat, dog, and humans.



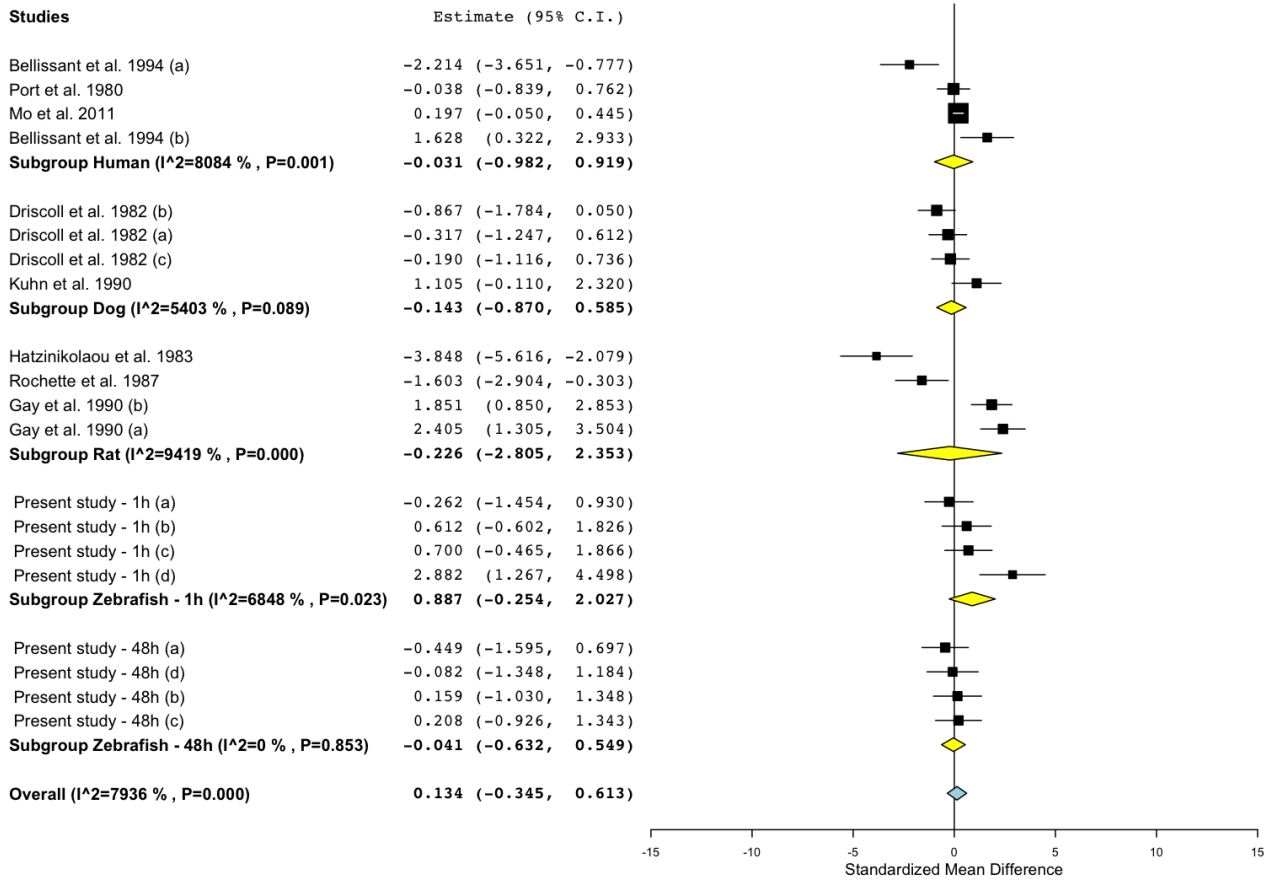

**Supplementary Figure 3.** Meta-analysis of the effects of propranolol on stroke volume in zebrafish, rat, dog, and humans.

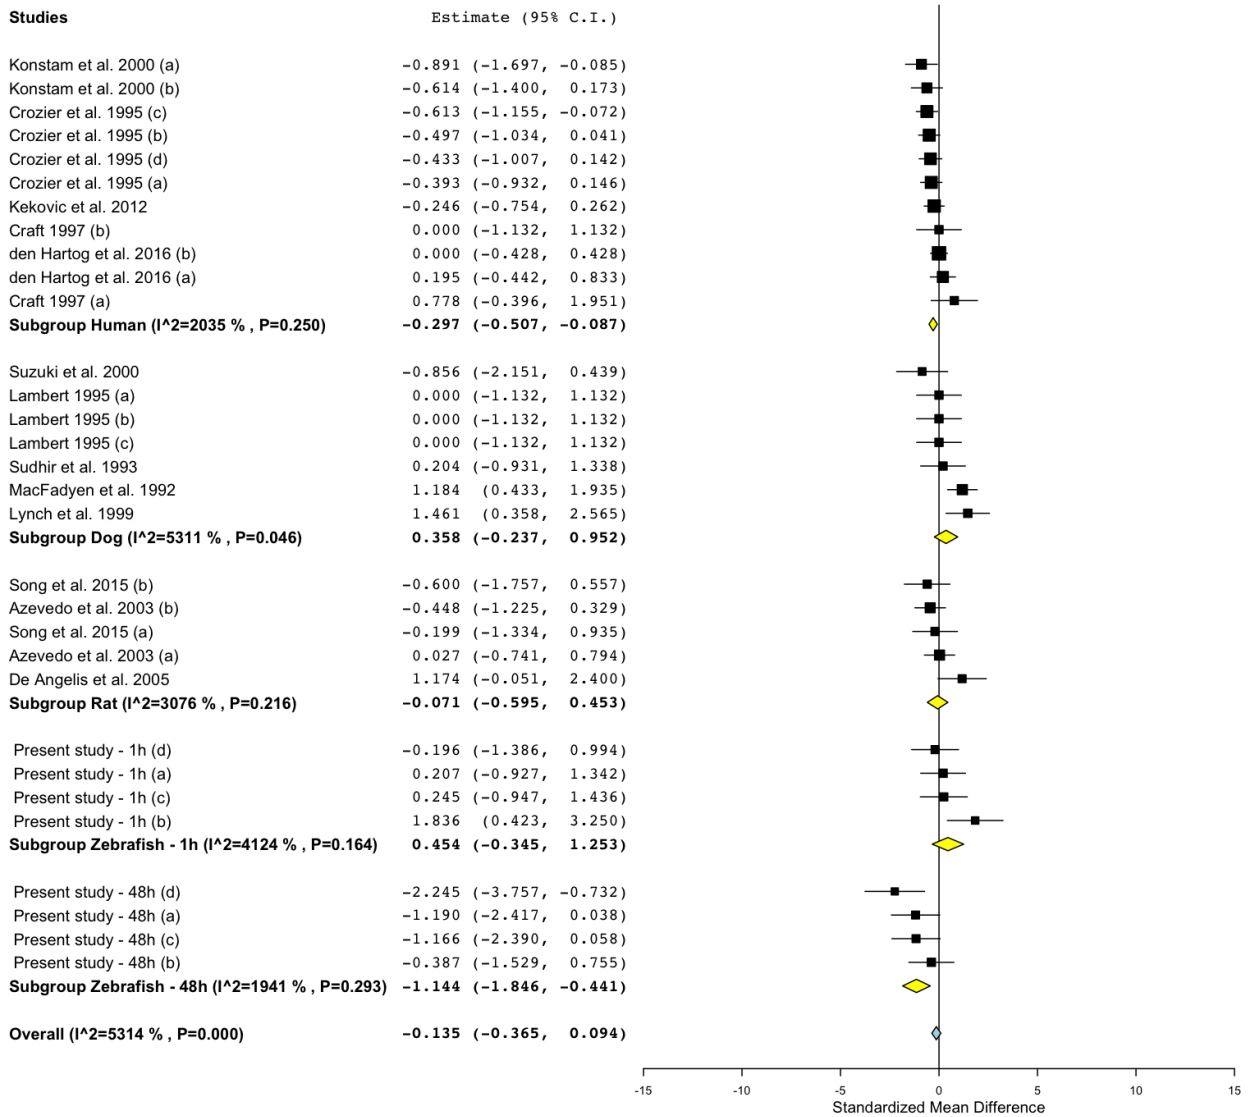

**Supplementary Figure 4.** Meta-analysis of the effects of losartan on heart rate in zebrafish, rat, dog, and humans.

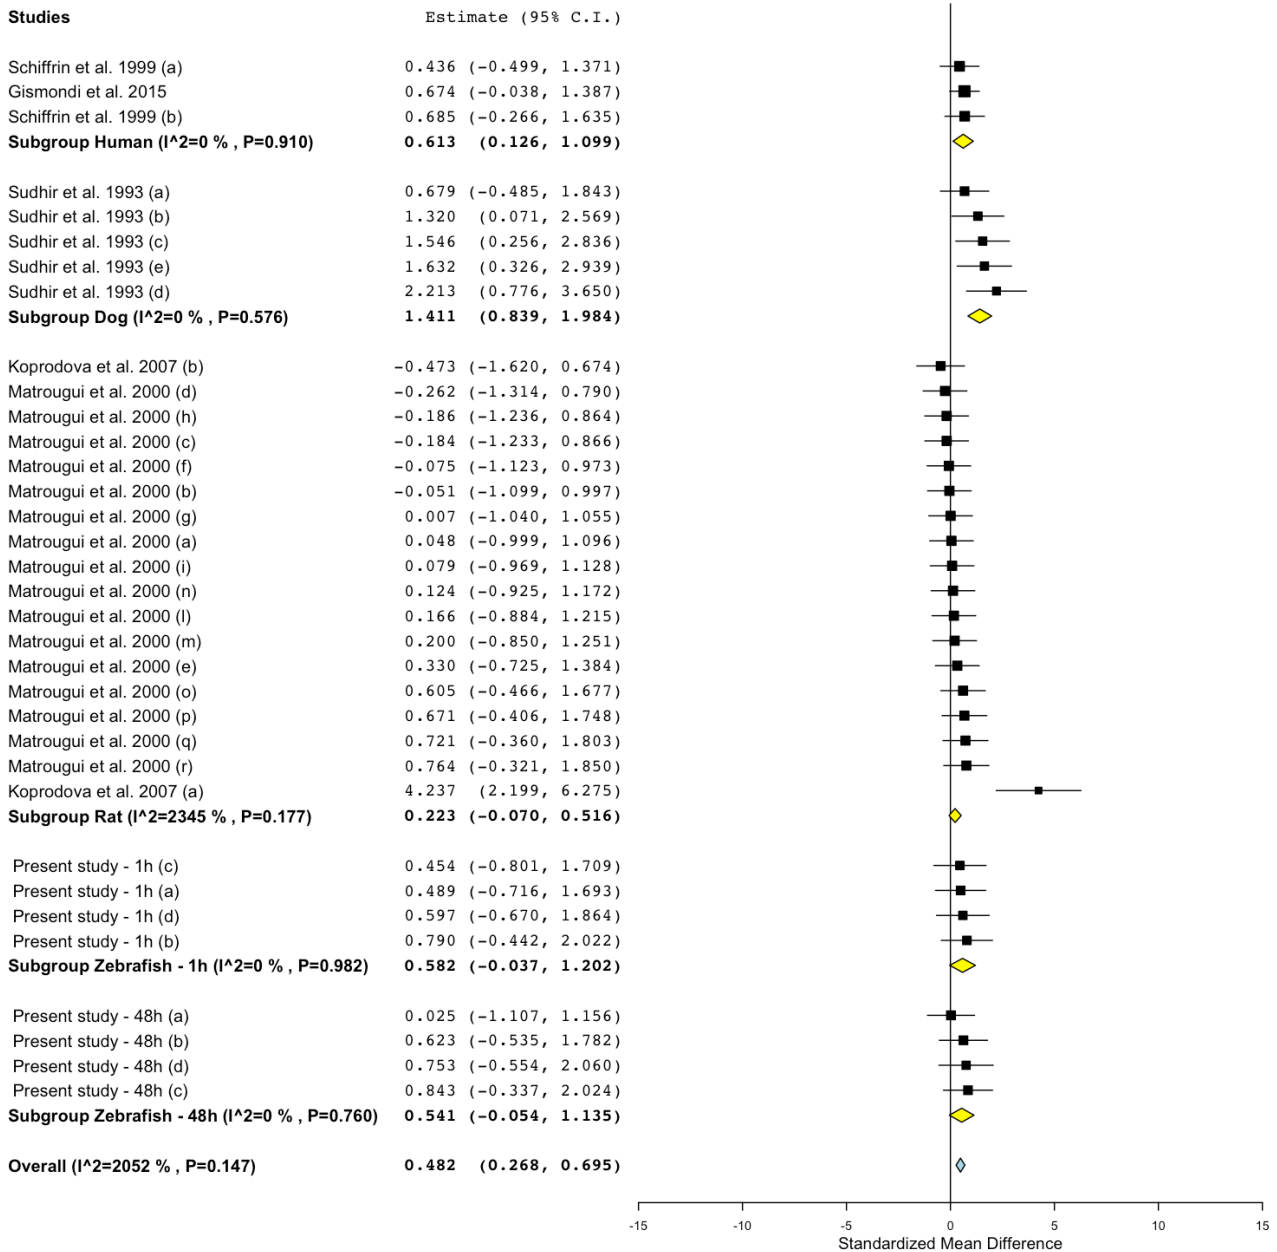

**Supplementary Figure 5.** Meta-analysis of the effects of losartan on vessel diameter in zebrafish, rat, dog, and humans.

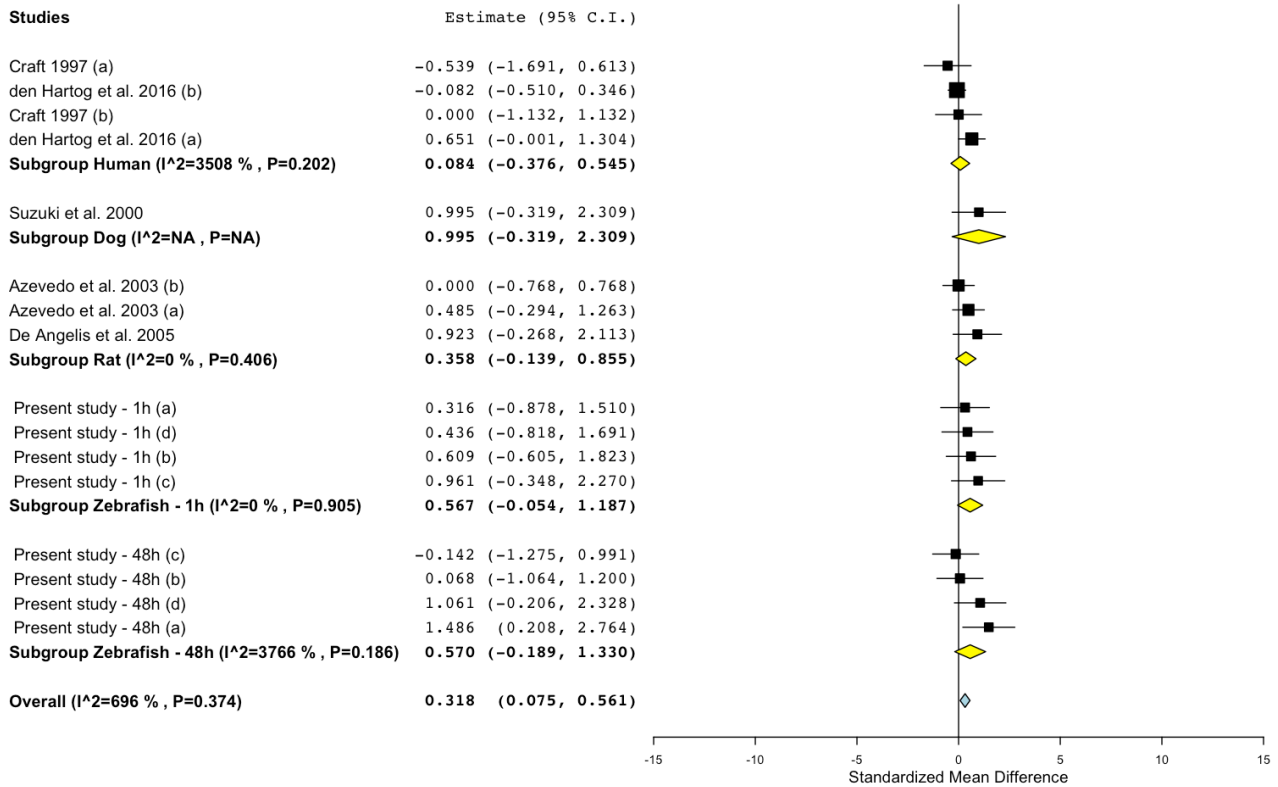

**Supplementary Figure 6.** Meta-analysis of the effects of losartan on stroke volume in zebrafish, rat, dog, and humans.

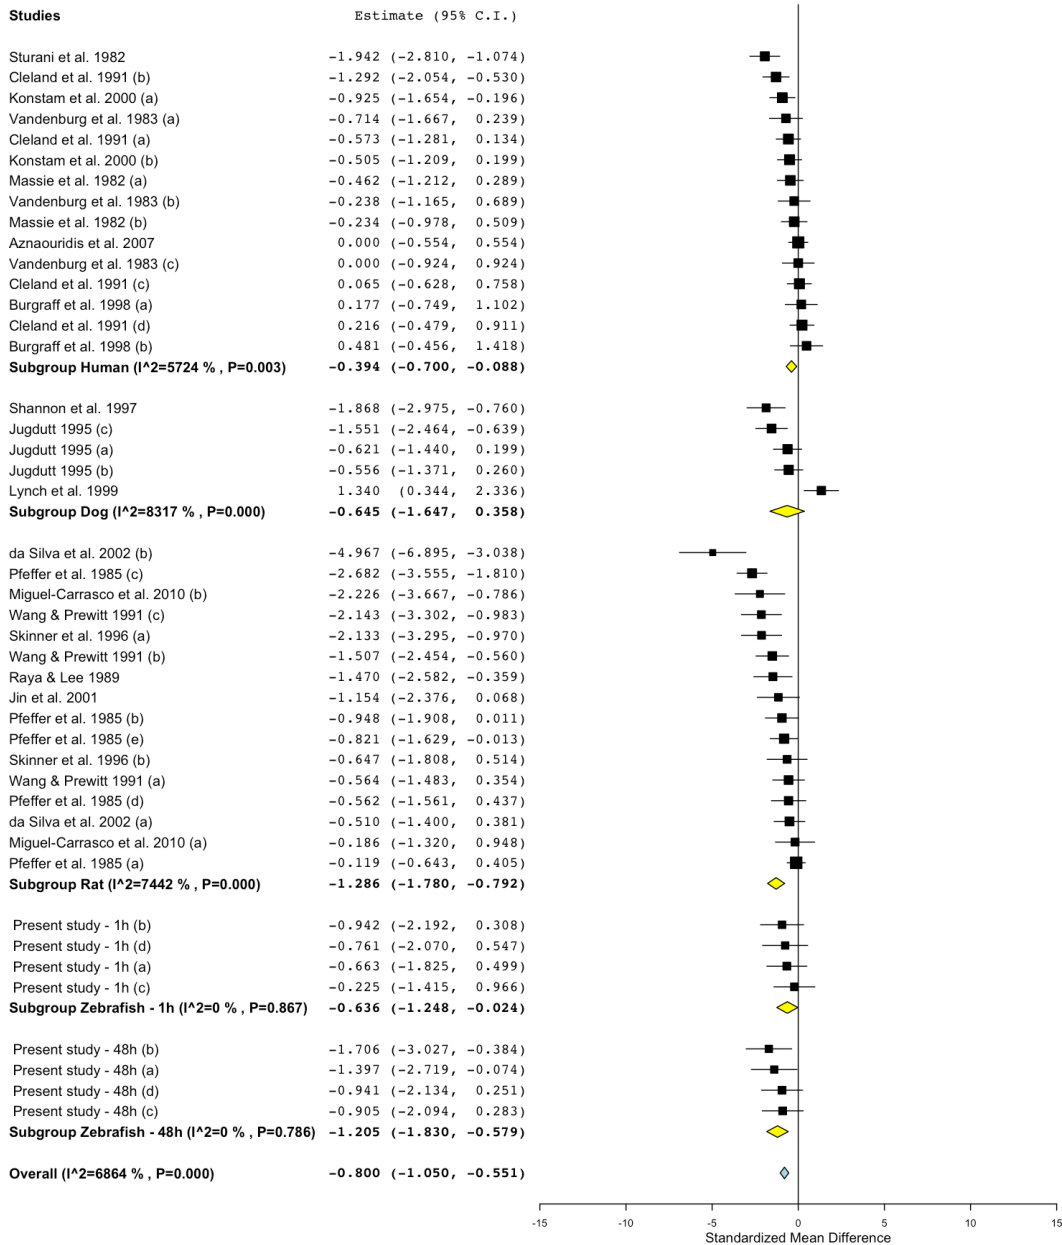

**Supplementary Figure 7.** Meta-analysis of the effects of captopril on heart rate in zebrafish, rat, dog, and humans.

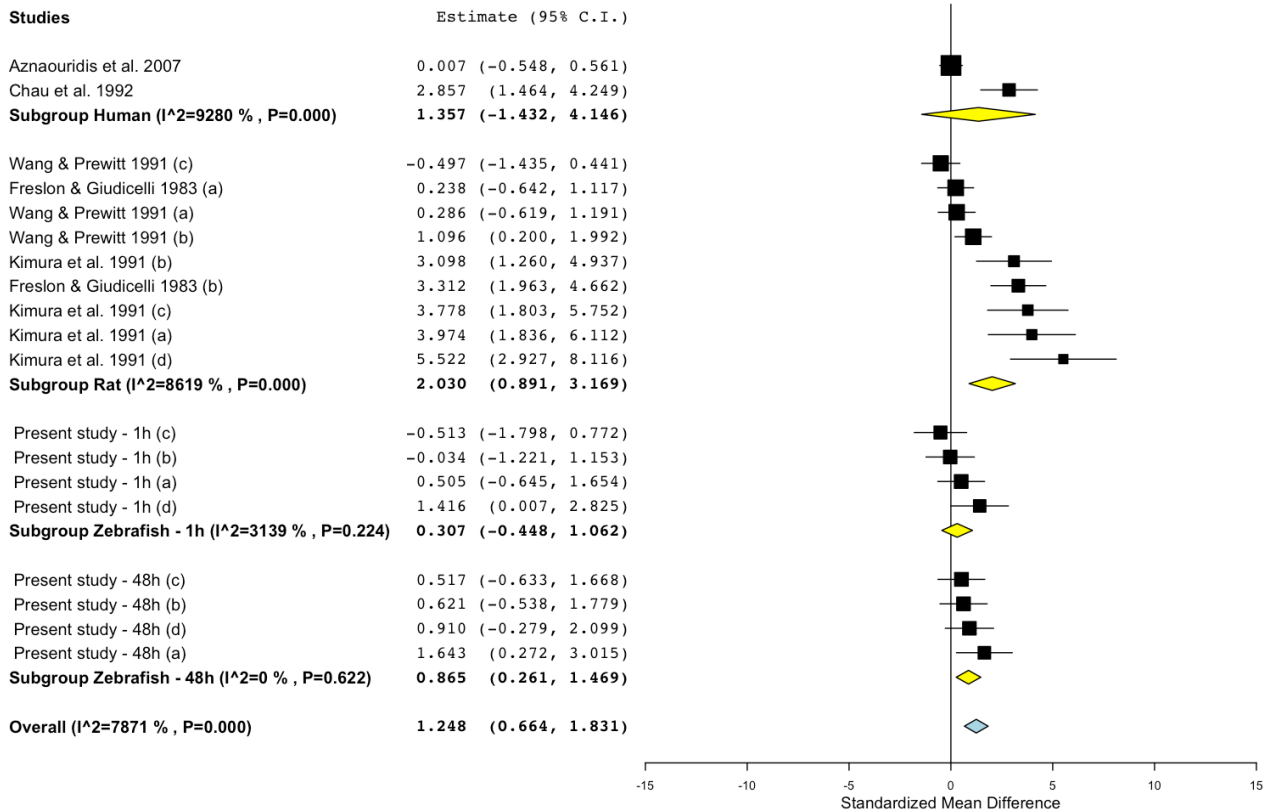

**Supplementary Figure 8.** Meta-analysis of the effects of captopril on vessel diameter in zebrafish, rat, dog, and humans.

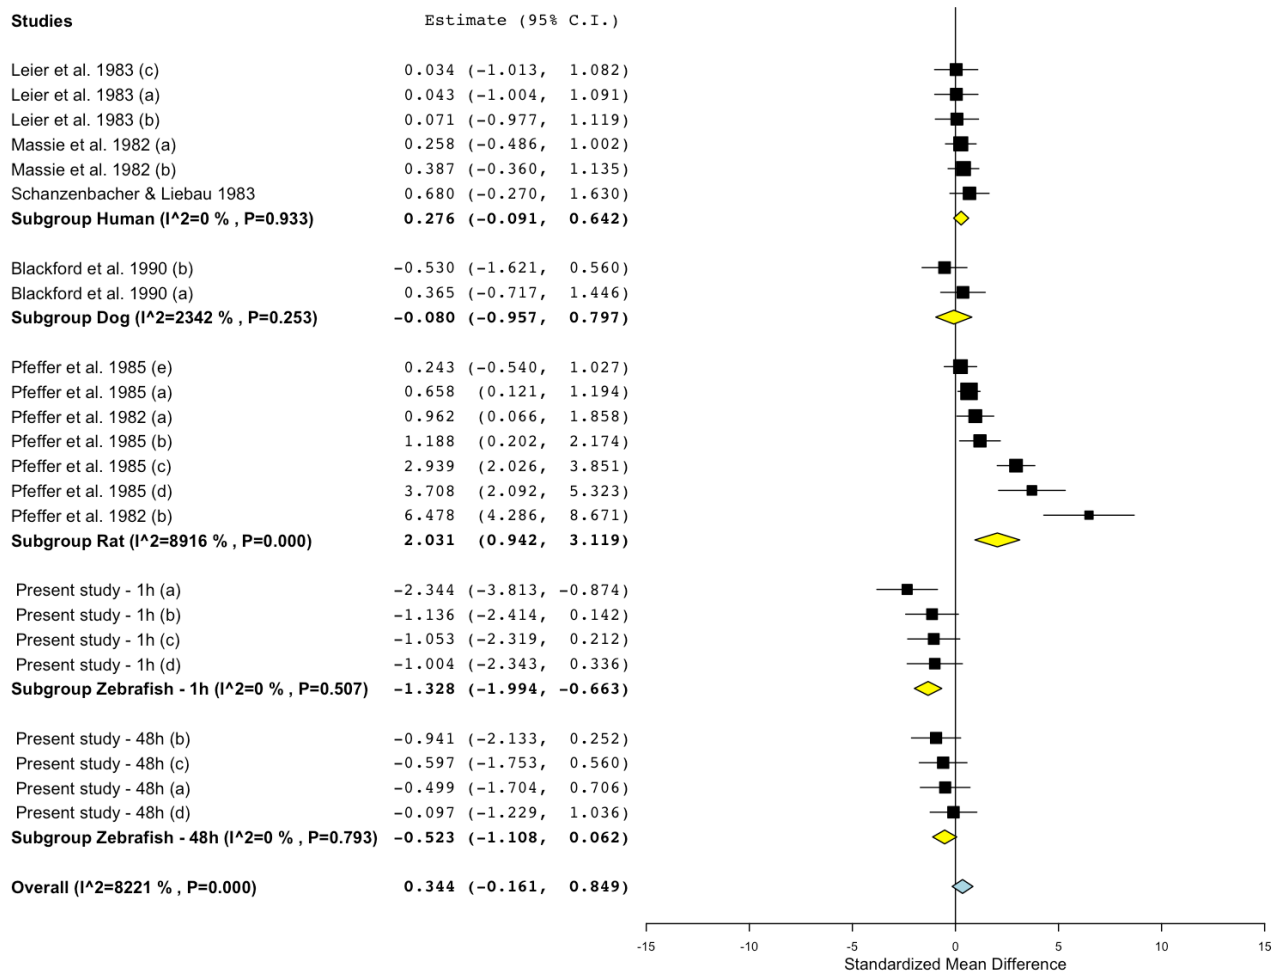

**Supplementary Figure 9.** Meta-analysis of the effects of captopril on stroke volume in zebrafish, rat, dog, and humans.
