# Supplementary material for: Testing the Translational Power of the Zebrafish: An Interspecies Analysis of Responses to Cardiovascular Drugs
Source: Front Pharmacol. 2019 Aug 16;10:893. doi: 10.3389/fphar.2019.00893 (PMC6707810; doi:10.3389/fphar.2019.00893)
Supplement: Supplementary file 3 [file Table_1.xlsx]

## Sheet: PROPRANOLOL
Endpoint	Study name	Year	Group A Number (treated)	Group A mean (treated)	Group A StD (treated)	Group B Number (control)	Group B mean (control)	Group B StD (control)	Health status (1 healthy, 2 disease)	Health status details	Exposure duration (1= short (up to 24h), 2= medium (between 24h and 2 weeks), 3= chronic (>2 weeks)	Species
BF	Vigue et al. 1993 (b)	1993	6	20	3.3	6	28.7	4.6	1	Healthy	1	Dog
BF	Vigue et al. 1993 (a)	1993	6	11.8	1.8	6	12.5	2	1	Healthy	1	Dog
BF	Kuhn et al. 1990	1990	6	0.73	0.06	6	1.01	0.16	1	Healthy	1	Dog
BF	Driscoll et al. 1982 (c)	1982	9	88	11	9	96	13	1	Healthy	1	Dog
BF	Driscoll et al. 1982 (b)	1982	10	34.8	12	10	36	12	1	Healthy	1	Dog
BF	Driscoll et al. 1982 (a)	1982	9	8.1	0.81	9	7.8	0.78	1	Healthy	1	Dog
BF	Berdeaux et al. 1991 (d)	1991	7	48	6	7	73	13	1	Healthy	1	Dog
BF	Berdeaux et al. 1991 (c)	1991	7	41	5	7	63	10	1	Healthy	1	Dog
BF	Berdeaux et al. 1991 (b)	1991	7	34	4	7	47	6	1	Healthy	1	Dog
BF	Berdeaux et al. 1991 (a)	1991	7	26	3	7	30	4	1	Healthy	1	Dog
BF	Willems et al. 1986 (d)	1986	8	170	37	8	209	30	2	Biliary cirrhosis	1	Dog
BF	Willems et al. 1986 (c)	1986	8	154	37	8	209	30	2	Biliary cirrhosis	1	Dog
BF	Willems et al. 1986 (b)	1986	8	210	27	8	209	30	2	Biliary cirrhosis	1	Dog
BF	Willems et al. 1986 (a)	1986	8	210	27	8	209	30	2	Biliary cirrhosis	1	Dog
BF	Bellissant et al. 1994 (d)	1994	6	277	8	6	303	11	1	Healthy	1	Human
BF	Bellissant et al. 1994 (c)	1994	6	101	6	6	119	16	1	Healthy	1	Human
BF	Bellissant et al. 1994 (b)	1994	6	403	28	6	375	44	1	Healthy	1	Human
BF	Bellissant et al. 1994 (a)	1994	6	81.2	7.7	6	85	9	1	Healthy	1	Human
BF	Zain-Hamid et al. 2003 (c)	2003	4	597.74	247.762	12	652.98	278.87	2	Liver cirrhosis	2	Human
BF	Zain-Hamid et al. 2003 (b)	2003	4	593.43	131.741	12	652.98	278.87	2	Liver cirrhosis	2	Human
BF	Zain-Hamid et al. 2003 (a)	2003	4	661.86	280.43	12	652.98	278.87	2	Liver cirrhosis	2	Human
BF	Saigal et al. 1998	1998	10	413	120	10	586	220	2	Liver cirrhosis	2	Human
BF	Danesh et al. 1984	1984	7	412	48	7	518	56	2	Hypertension	3	Human
BF	Rochette et al. 1987 (q)	1987	6	9.94	3.19	6	12.69	2.84	1	Healthy	1	Rat
BF	Rochette et al. 1987 (p)	1987	6	0.09	0.01	6	0.07	0.01	1	Healthy	1	Rat
BF	Rochette et al. 1987 (o)	1987	6	0.12	0.01	6	0.18	0.02	1	Healthy	1	Rat
BF	Rochette et al. 1987 (n)	1987	6	4.32	0.65	6	6.07	0.89	1	Healthy	1	Rat
BF	Rochette et al. 1987 (m)	1987	6	4.45	0.66	6	6.12	0.88	1	Healthy	1	Rat
BF	Rochette et al. 1987 (l)	1987	6	5.08	0.96	6	6.89	0.99	1	Healthy	1	Rat
BF	Rochette et al. 1987 (i)	1987	6	0.58	0.13	6	1.39	0.65	1	Healthy	1	Rat
BF	Rochette et al. 1987 (h)	1987	6	0.3	0.05	6	0.52	0.09	1	Healthy	1	Rat
BF	Rochette et al. 1987 (g)	1987	6	1.14	0.13	6	1.52	0.12	1	Healthy	1	Rat
BF	Rochette et al. 1987 (f)	1987	6	0.36	0.12	6	0.75	0.24	1	Healthy	1	Rat
BF	Rochette et al. 1987 (e)	1987	6	1.69	0.31	6	3.14	0.38	1	Healthy	1	Rat
BF	Rochette et al. 1987 (d)	1987	6	10.08	1.76	6	13.64	1.52	1	Healthy	1	Rat
BF	Rochette et al. 1987 (c)	1987	6	0.26	0.07	6	0.4	0.06	1	Healthy	1	Rat
BF	Rochette et al. 1987 (b)	1987	6	0.6	0.12	6	0.85	0.13	1	Healthy	1	Rat
BF	Rochette et al. 1987 (a)	1987	6	6.11	2.41	6	9.58	1.87	1	Healthy	1	Rat
BF	Skinner et al. 1996 (m)	1996	5	0.95	0.08	5	0.9	0.08	1	Healthy	3	Rat
BF	Skinner et al. 1996 (l)	1996	5	2.13	0.32	5	1.87	0.25	1	Healthy	3	Rat
BF	Skinner et al. 1996 (h)	1996	5	4.33	0.51	5	3.07	0.4	1	Healthy	3	Rat
BF	Skinner et al. 1996 (g)	1996	5	3.18	0.36	5	2.23	0.36	1	Healthy	3	Rat
BF	Skinner et al. 1996 (f)	1996	5	4.52	0.72	5	3.94	0.72	1	Healthy	3	Rat
BF	Skinner et al. 1996 (e)	1996	7	0.2	0.07	5	0.6	0.08	2	Hypertension	3	Rat
BF	Skinner et al. 1996 (d)	1996	7	0.45	0.06	5	1.1	0.08	2	Hypertension	3	Rat
BF	Skinner et al. 1996 (c)	1996	7	1.38	0.21	5	2.44	0.25	2	Hypertension	3	Rat
BF	Skinner et al. 1996 (b)	1996	7	1.47	0.19	5	2.07	0.23	2	Hypertension	3	Rat
BF	Skinner et al. 1996 (a)	1996	7	2.06	0.33	5	3.61	0.4	2	Hypertension	3	Rat
BF	Present study - 48h (d)		5	0.12	0.045	6	0.233	0.052	1	Healthy	2	Zebrafish - Present study - 48h
BF	Present study - 48h (c)		6	0.167	0.052	6	0.233	0.052	1	Healthy	2	Zebrafish - Present study - 48h
BF	Present study - 48h (b)		6	0.2	0.063	6	0.233	0.052	1	Healthy	2	Zebrafish - Present study - 48h
BF	Present study - 48h (a)		6	0.15	0.055	6	0.233	0.052	1	Healthy	1	Zebrafish - Present study - 48h
BF	Present study - 1h (d)		6	0.2	0.045	6	0.162	0.023	1	Healthy	1	Zebrafish - Present study -1h
BF	Present study - 1h (c)		6	0.173	0.059	6	0.162	0.023	1	Healthy	1	Zebrafish - Present study -1h
BF	Present study - 1h (b)		4	0.168	0.026	6	0.162	0.023	1	Healthy	1	Zebrafish - Present study -1h
BF	Present study - 1h (a)		5	0.156	0.046	6	0.162	0.023	1	Healthy	1	Zebrafish - Present study -1h
HR	Vigue et al. 1993 (b)	1993	6	171	5	6	211	5	1	Healthy	1	Dog
HR	Vigue et al. 1993 (a)	1993	6	81	5	6	87	6	1	Healthy	1	Dog
HR	Kuhn et al. 1990	1990	6	69	7	6	88	9	1	Healthy	1	Dog
HR	Driscoll et al. 1982 (c)	1982	9	106	7	9	114	9	1	Healthy	1	Dog
HR	Driscoll et al. 1982 (b)	1982	10	152	5	10	156	9	1	Healthy	1	Dog
HR	Driscoll et al. 1982 (a)	1982	9	174	8	9	177	8	1	Healthy	1	Dog
HR	Berdeaux et al. 1991 (d)	1991	7	169	5	7	211	9	1	Healthy	1	Dog
HR	Berdeaux et al. 1991 (c)	1991	7	163	4	7	200	7	1	Healthy	1	Dog
HR	Berdeaux et al. 1991 (b)	1991	7	140	3	7	159	5	1	Healthy	1	Dog
HR	Berdeaux et al. 1991 (a)	1991	7	90	6	7	98	4	1	Healthy	1	Dog
HR	Willems et al. 1986 (d)	1986	8	112	10	8	163	12	2	Biliary cirrhosis	1	Dog
HR	Willems et al. 1986 (c)	1986	8	119	10	8	163	12	2	Biliary cirrhosis	1	Dog
HR	Willems et al. 1986 (b)	1986	8	119	10	8	163	12	2	Biliary cirrhosis	1	Dog
HR	Willems et al. 1986 (a)	1986	8	122	10	8	163	12	2	Biliary cirrhosis	1	Dog
HR	Bellissant et al. 1994 (b)	1994	6	132	9	6	179	2	1	Healthy	1	Human
HR	Bellissant et al. 1994 (a)	1994	6	68	4	6	76	3	1	Healthy	1	Human
HR	Port et al. 1980	1980	12	49.2	6.8	12	64.8	10.9	1	Healthy	2	Human
HR	Marshall et al. 1981 (a)	1981	18	69	11	7	83	9	1	Healthy	2	Human
HR	Le Winter et al. 1975	1975	10	56	2.8	10	68	3.3	1	Healthy	2	Human
HR	Crawford et al. 1980 (a)	1980	19	52	8	19	63	10	1	Healthy	2	Human
HR	Crawford et al. 1980 (b)	1980	10	96	10	10	121	15	1	Healthy	3	Human
HR	Mo et al. 2011	2011	126	63	5	126	72	7	2	Various	1	Human
HR	Morris et al. 1983 (d)	1983	22	86	18	22	122	20	2	Angina pectoris	2	Human
HR	Morris et al. 1983 (c)	1983	22	52	8	22	71	14	2	Angina pectoris	2	Human
HR	Morris et al. 1983 (b)	1983	22	93	18	22	122	20	2	Angina pectoris	2	Human
HR	Morris et al. 1983 (a)	1983	22	55	10	22	71	14	2	Angina pectoris	2	Human
HR	Marshall et al. 1981 (b)	1981	18	60	9	7	76	13	2	Coronary artery disease	2	Human
HR	Zain-Hamid et al. 2003 (c)	2003	4	52.78	2.296	12	64.17	6.39	2	Liver cirrhosis	2	Human
HR	Zain-Hamid et al. 2003 (b)	2003	4	51.93	2.783	12	64.17	6.39	2	Liver cirrhosis	2	Human
HR	Zain-Hamid et al. 2003 (a)	2003	4	58.22	1.246	12	64.17	6.39	2	Liver cirrhosis	2	Human
HR	Saigal et al. 1998	1998	10	70.2	15.6	10	87.2	14.4	2	Liver cirrhosis	2	Human
HR	Danesh et al. 1984	1984	7	65	3	7	82	3	2	Hypertension	3	Human
HR	Rochette et al. 1987	1987	6	328	14	6	420	27	1	Healthy	1	Rat
HR	Hatzinikolaou et al. 1983	1983	7	356	11	7	464	7	1	Healthy	1	Rat
HR	Skinner et al. 1996 (b)	1996	6	283	19	6	369	30	1	Healthy	3	Rat
HR	Gay et al. 1990 (c)	1990	10	329	7	12	374	7	1	Healthy	3	Rat
HR	Gay et al. 1990 (a)	1990	10	332	10	12	346	7	1	Healthy	3	Rat
HR	Skinner et al. 1996 (a)	1996	9	346	26	12	494	22	2	Hypertension	3	Rat
HR	Gay et al. 1990 (d)	1990	10	325	3	12	352	9	2	Myocardial infarction	3	Rat
HR	Gay et al. 1990 (b)	1990	10	299	10	12	326	7	2	Myocardial infarction	3	Rat
HR	Schwerte et al. 2006 (b)	2006	7	181.3	3.5	7	191.6	2.4	1	Healthy	2	Zebrafish - Other studies
HR	Schwerte et al. 2006 (a)	2006	7	230.8	3.8	7	240	1.4	1	Healthy	2	Zebrafish - Other studies
HR	Fraysse et al. 2006 (d)	2006	48	159	31	48	260.8	14	1	Healthy	2	Zebrafish - Other studies
HR	Fraysse et al. 2006 (c)	2006	48	213	21	48	260.8	14	1	Healthy	2	Zebrafish - Other studies
HR	Fraysse et al. 2006 (b)	2006	48	233	16	48	260.8	14	1	Healthy	2	Zebrafish - Other studies
HR	Fraysse et al. 2006 (a)	2006	48	249	12	48	260.8	14	1	Healthy	2	Zebrafish - Other studies
HR	Finn et al. 2012 (t)	2012	20	137	5	20	159	5	1	Healthy	2	Zebrafish - Other studies
HR	Finn et al. 2012 (s)	2012	20	142	5	20	159	5	1	Healthy	2	Zebrafish - Other studies
HR	Finn et al. 2012 (r)	2012	20	143	5	20	159	5	1	Healthy	2	Zebrafish - Other studies
HR	Finn et al. 2012 (q)	2012	20	124	11	20	166	11	1	Healthy	2	Zebrafish - Other studies
HR	Finn et al. 2012 (p)	2012	20	147	10	20	166	11	1	Healthy	2	Zebrafish - Other studies
HR	Finn et al. 2012 (o)	2012	20	134	8	20	166	11	1	Healthy	2	Zebrafish - Other studies
HR	Finn et al. 2012 (n)	2012	20	121	10	20	166	11	1	Healthy	2	Zebrafish - Other studies
HR	Finn et al. 2012 (m)	2012	20	137	11	20	166	11	1	Healthy	2	Zebrafish - Other studies
HR	Finn et al. 2012 (l)	2012	20	128	10	20	166	11	1	Healthy	2	Zebrafish - Other studies
HR	Finn et al. 2012 (i)	2012	20	165	8	20	157	4	1	Healthy	2	Zebrafish - Other studies
HR	Finn et al. 2012 (h)	2012	20	160	4	20	157	4	1	Healthy	2	Zebrafish - Other studies
HR	Finn et al. 2012 (g)	2012	20	157	8	20	157	4	1	Healthy	2	Zebrafish - Other studies
HR	Finn et al. 2012 (f)	2012	20	172	11	20	168	8	1	Healthy	2	Zebrafish - Other studies
HR	Finn et al. 2012 (e)	2012	20	167	8	20	168	8	1	Healthy	2	Zebrafish - Other studies
HR	Finn et al. 2012 (d)	2012	20	155	10	20	168	8	1	Healthy	2	Zebrafish - Other studies
HR	Finn et al. 2012 (c)	2012	20	168	7	20	162	5	1	Healthy	2	Zebrafish - Other studies
HR	Finn et al. 2012 (b)	2012	20	163	1	20	162	5	1	Healthy	2	Zebrafish - Other studies
HR	Finn et al. 2012 (a)	2012	20	157	12	20	162	5	1	Healthy	2	Zebrafish - Other studies
HR	Present study - 48h (d)		5	133.9	30.84	6	239.5	12	1	Healthy	2	Zebrafish - Present study - 48h
HR	Present study - 48h (c)		6	176.2	21.83	6	239.5	12	1	Healthy	2	Zebrafish - Present study - 48h
HR	Present study - 48h (b)		4	175.5	19.54	6	239.5	12	1	Healthy	2	Zebrafish - Present study - 48h
HR	Present study - 48h (a)		6	184.093	21.756	6	239.5	12	1	Healthy	2	Zebrafish - Present study - 48h
HR	Present study - 1h (d)		6	150.7	28.41	5	226.7	15.01	1	Healthy	1	Zebrafish - Present study -1h
HR	Present study - 1h (c)		6	189.1	17.08	5	226.7	15.01	1	Healthy	1	Zebrafish - Present study -1h
HR	Present study - 1h (b)		5	194.2	20.95	5	226.7	15.01	1	Healthy	1	Zebrafish - Present study -1h
HR	Present study - 1h (a)		5	209.2	12.97	5	226.7	15.01	1	Healthy	1	Zebrafish - Present study -1h
SV	Kuhn et al. 1990	1990	6	53.4	5.6	6	47.1	4.9	1	Healthy	1	Dog
SV	Driscoll et al. 1982 (c)	1982	9	28	7	9	29.4	7	1	Healthy	1	Dog
SV	Driscoll et al. 1982 (b)	1982	10	4.2	0.3	10	4.5	0.36	1	Healthy	1	Dog
SV	Driscoll et al. 1982 (a)	1982	9	4.4	0.6	9	4.6	0.6	1	Healthy	1	Dog
SV	Mo et al. 2011	2011	126	45.9	4.59	126	45	4.5	1	Healthy	1	Human
SV	Bellissant et al. 1994 (b)	1994	6	66.7	6.67	6	55.87	5.56	1	Healthy	1	Human
SV	Bellissant et al. 1994 (a)	1994	6	70.2	0.7	6	84.6	8.46	1	Healthy	1	Human
SV	Port et al. 1980	1980	12	83.7	19.4	12	84.4	15.6	1	Healthy	2	Human
SV	Rochette et al. 1987	1987	6	0.24	0.024	6	0.28	0.022	1	Healthy	1	Rat
SV	Hatzinikolaou et al. 1983	1983	7	0.078	0.004	7	0.091	0.002	1	Healthy	1	Rat
SV	Gay et al. 1990 (a)	1990	10	0.53	0.02	12	0.48	0.02	1	Healthy	3	Rat
SV	Gay et al. 1990 (b)	1990	10	0.54	0.02	12	0.49	0.03	2	Myocardial infarction	3	Rat
SV	Present study - 48h (d)		4	0.051	0.022	6	0.053	0.022	1	Healthy	2	Zebrafish - Present study - 48h
SV	Present study - 48h (c)		6	0.057	0.012	6	0.053	0.022	1	Healthy	2	Zebrafish - Present study - 48h
SV	Present study - 48h (b)		5	0.056	0.008	6	0.053	0.022	1	Healthy	2	Zebrafish - Present study - 48h
SV	Present study - 48h (a)		6	0.043	0.019	6	0.053	0.022	1	Healthy	2	Zebrafish - Present study - 48h
SV	Present study - 1h (d)		6	0.084	0.014	6	0.046	0.01	1	Healthy	1	Zebrafish - Present study -1h
SV	Present study - 1h (c)		6	0.058	0.02	6	0.046	0.01	1	Healthy	1	Zebrafish - Present study -1h
SV	Present study - 1h (b)		5	0.053	0.011	6	0.046	0.01	1	Healthy	1	Zebrafish - Present study -1h
SV	Present study - 1h (a)		5	0.043	0.011	6	0.046	0.01	1	Healthy	1	Zebrafish - Present study -1h
VD	Vigue et al. 1993 (b)	1993	6	3.333	0.077	6	3.612	0.08	1	Healthy	1	Dog
VD	Vigue et al. 1993 (a)	1993	6	3.383	0.082	6	3.486	0.087	1	Healthy	1	Dog
VD	Kuhn et al. 1990	1990	6	3.5	0.3	6	3.5	0.3	1	Healthy	1	Dog
VD	Berdeaux et al. 1991 (d)	1991	7	3.472	0.262	7	3.934	0.296	1	Healthy	1	Dog
VD	Berdeaux et al. 1991 (c)	1991	7	3.484	0.263	7	3.915	0.3	1	Healthy	1	Dog
VD	Berdeaux et al. 1991 (b)	1991	7	3.509	0.264	7	3.849	0.297	1	Healthy	1	Dog
VD	Berdeaux et al. 1991 (a)	1991	7	3.566	0.264	7	3.711	0.295	1	Healthy	1	Dog
VD	Bellissant et al. 1994 (b)	1994	6	4.9	0.1	6	4.8	0.1	1	Healthy	1	Human
VD	Bellissant et al. 1994 (a)	1994	6	4.5	0.1	6	4.7	0.2	1	Healthy	1	Human
VD	Zain-Hamid et al. 2003 (c)	2003	4	9.11	1.913	12	9.42	2.6	2	Liver cirrhosis	2	Human
VD	Zain-Hamid et al. 2003 (b)	2003	4	10.64	1.256	12	9.42	2.6	2	Liver cirrhosis	2	Human
VD	Zain-Hamid et al. 2003 (a)	2003	4	10.27	2.039	12	9.42	2.6	2	Liver cirrhosis	2	Human
VD	Saigal et al. 1998	1998	10	9.5	1.2	10	9.9	1.5	2	Liver cirrhosis	2	Human
VD	Chillon & Baumbach 1998 (b)	1998	13	85	2	16	77	2	2	Hypertension	3	Rat
VD	Chillon & Baumbach 1998 (a)	1998	13	38	1	16	33	1	2	Hypertension	3	Rat
VD	Present study - 48h (d)		5	12.36	1.021	6	13.57	0.532	1	Healthy	2	Zebrafish - Present study - 48h
VD	Present study - 48h (c)		6	13.38	1.432	6	13.57	0.532	1	Healthy	2	Zebrafish - Present study - 48h
VD	Present study - 48h (b)		6	13.55	1.001	6	13.57	0.532	1	Healthy	2	Zebrafish - Present study - 48h
VD	Present study - 48h (a)		6	13.47	0.505	6	13.57	0.532	1	Healthy	2	Zebrafish - Present study -1h
VD	Present study - 1h (d)		6	15.05	1.261	6	13.54	1.421	1	Healthy	1	Zebrafish - Present study -1h
VD	Present study - 1h (c)		6	13.83	0.659	6	13.54	1.421	1	Healthy	1	Zebrafish - Present study -1h
VD	Present study - 1h (b)		5	13.22	0.987	6	13.54	1.421	1	Healthy	1	Zebrafish - Present study -1h
VD	Present study - 1h (a)		6	13.1	1.003	6	13.54	1.421	1	Healthy	1	Zebrafish - Present study -1h

## Sheet: LOSARTAN
Endpoint	Study name	Year	Group A Number (treated)	Group A mean (treated)	Group A StD (treated)	Group B Number (control)	Group B mean (control)	Group B StD (control)	Health status (1 healthy, 2 disease)	Health status details	Exposure duration (1= short (up to 24h), 2= medium (between 24h and 2 weeks), 3= chronic (>2 weeks)	Species
BF	Sudhir et al. 1993 (a)	1993	6	96.65	21.4	6	74	19	1	Healthy	1	Dog
BF	Sudhir et al. 1993 (b)	1993	6	105.8	24.9	6	74	19	1	Healthy	1	Dog
BF	Sudhir et al. 1993 (c)	1993	6	130.2	35.4	6	74	19	1	Healthy	1	Dog
BF	Sudhir et al. 1993 (d)	1993	6	151	36	6	74	19	1	Healthy	1	Dog
BF	Sudhir et al. 1993 (e)	1993	6	154	28	6	74	19	1	Healthy	1	Dog
BF	Paterna et al. 2000 (a)	2000	18	475	89	18	440	116	2	Hypertension	3	Human
BF	Paterna et al. 2000 (b)	2000	18	487	128	18	440	116	2	Hypertension	3	Human
BF	Paterna et al. 2000 (c)	2000	18	805	174	18	758	214	2	Hypertension	3	Human
BF	Paterna et al. 2000 (d)	2000	18	842	265	18	758	214	2	Hypertension	3	Human
BF	De Angelis et al. 2005 (a)	2005	6	7.7	1.1	6	3.4	0.8	1	Healthy	1	Rat
BF	De Angelis et al. 2005 (b)	2005	6	3.6	0.7	6	1.8	0.2	1	Healthy	1	Rat
BF	De Angelis et al. 2005 (c)	2005	6	10.1	2	6	5.7	1	1	Healthy	1	Rat
BF	De Angelis et al. 2005 (d)	2005	6	10	1.8	6	5.5	1	1	Healthy	1	Rat
BF	De Angelis et al. 2005 (e)	2005	6	0.9	0.2	6	0.6	0.2	1	Healthy	1	Rat
BF	De Angelis et al. 2005 (f)	2005	6	2.1	0.8	6	0.8	0.2	1	Healthy	1	Rat
BF	De Angelis et al. 2005 (g)	2005	6	0.7	0.1	6	0.4	0.08	1	Healthy	1	Rat
BF	De Angelis et al. 2005 (h)	2005	6	5.3	1.9	6	1.8	0.3	1	Healthy	1	Rat
BF	Present study - 48h (a)		6	0.325	0.069	6	0.263	0.046	1	Healthy	2	Zebrafish - Present study - 48h
BF	Present study - 48h (b)		6	0.257	0.068	6	0.263	0.046	1	Healthy	2	Zebrafish - Present study - 48h
BF	Present study - 48h (c)		6	0.232	0.04	6	0.263	0.046	1	Healthy	2	Zebrafish - Present study - 48h
BF	Present study - 48h (d)		5	0.28	0.061	6	0.263	0.046	1	Healthy	2	Zebrafish - Present study - 48h
BF	Present study - 1h (a)		6	0.202	0.052	5	0.176	0.046	1	Healthy	1	Zebrafish - Present study -1h
BF	Present study - 1h (b)		6	0.21	0.03	5	0.176	0.046	1	Healthy	1	Zebrafish - Present study -1h
BF	Present study - 1h (c)		5	0.23	0.062	5	0.176	0.046	1	Healthy	1	Zebrafish - Present study -1h
BF	Present study - 1h (d)		5	0.196	0.031	5	0.176	0.046	1	Healthy	1	Zebrafish - Present study -1h
HR	Suzuki et al. 2000	2000	5	107	3.2	5	115	11.5	2	Heart failure	1	Dog
HR	Lambert 1995 (a)	1995	6	117	7	6	117	7	1	Healthy	1	Dog
HR	Lambert 1995 (b)	1995	6	109	7	6	109	7	1	Healthy	1	Dog
HR	Lambert 1995 (c)	1995	6	104	7	6	104	7	2	Healthy	1	Dog
HR	Sudhir et al. 1993	1993	6	146	8	6	144	10	1	Healthy	1	Dog
HR	Lynch et al. 1999	1999	8	128	5	8	121	4	1	Healthy	1	Dog
HR	MacFadyen et al. 1992	1992	16	103	15.2	16	84.6	15.1	2	Low sodium	1	Dog
HR	Craft 1997 (a)	1997	6	78	3.7	6	74	5.6	2	Hypertension	2	Human
HR	Craft 1997 (b)	1997	6	107	5.9	6	107	6.4	2	Hypertension	2	Human
HR	Crozier et al. 1995 (a)	1995	28	68.4	10	26	73	13	2	Heart failure	3	Human
HR	Crozier et al. 1995 (b)	1995	29	70.2	10	26	76	13	2	Heart failure	3	Human
HR	Crozier et al. 1995 (c)	1995	29	69.5	10	26	77	14	2	Heart failure	3	Human
HR	Crozier et al. 1995 (d)	1995	22	72.3	10	26	78	15	2	Heart failure	3	Human
HR	den Hartog et al. 2016 (a)	2016	19	70	16	19	67	14	2	Marfan syndrome	3	Human
HR	den Hartog et al. 2016 (b)	2016	42	68	21	42	68	13	2	Marfan syndrome	3	Human
HR	Kekovic et al. 2012	2012	30	70.29	10.35	30	73.21	12.97	2	Hypertension	3	Human
HR	Konstam et al. 2000 (a)	2000	13	61	14	13	73	12	2	Heart failure	3	Human
HR	Konstam et al. 2000 (b)	2000	13	66	10	13	73	12	2	Heart failure	2	Human
HR	De Angelis et al. 2005	2005	6	336	11	6	322	11	1	Healthy	1	Rat
HR	Song et al. 2015 (a)	2015	6	245	47	6	257	63	1	Healthy	2	Rat
HR	Song et al. 2015 (b)	2015	6	259	11	6	275	33	1	Healthy	2	Rat
HR	Azevedo et al. 2003 (a)	2003	11	323.4	31	16	322.6	28	2	Hypertension	3	Rat
HR	Azevedo et al. 2003 (b)	2003	11	308.9	32	16	322.6	28	2	Hypertension	3	Rat
HR	Present study - 48h (a)		6	230.9	10.15	6	251.9	20.68	1	Healthy	1	Zebrafish - Present study - 48h
HR	Present study - 48h (b)		6	244.9	11.35	6	251.9	20.68	1	Healthy	2	Zebrafish - Present study - 48h
HR	Present study - 48h (c)		6	229.1	14.95	6	251.9	20.68	1	Healthy	2	Zebrafish - Present study - 48h
HR	Present study - 48h (d)		5	208.4	13.08	6	251.9	20.68	1	Healthy	2	Zebrafish - Present study - 48h
HR	Present study - 1h (a)		6	248	17.43	6	245.1	5.369	1	Healthy	1	Zebrafish - Present study -1h
HR	Present study - 1h (b)		5	258	7.53	6	245.1	5.369	1	Healthy	1	Zebrafish - Present study -1h
HR	Present study - 1h (c)		5	247.7	13.27	6	245.1	5.369	1	Healthy	1	Zebrafish - Present study -1h
HR	Present study - 1h (d)		5	242.9	14.17	6	245.1	5.369	1	Healthy	1	Zebrafish - Present study -1h
SV	Suzuki et al. 2000	2000	5	13.11	0.9	5	11.4	2	2	Heart failure	1	Dog
SV	Craft 1997 (a)	1997	6	25	1.9	6	26	1.5	2	Hypertension	2	Human
SV	Craft 1997 (b)	1997	6	25	1.5	6	25	1.8	2	Hypertension	2	Human
SV	den Hartog et al. 2016 (a)	2016	19	94	16	19	84	14	2	Marfan syndrome	3	Human
SV	den Hartog et al. 2016 (b)	2016	42	83	6	42	84	16	2	Marfan syndrome	3	Human
SV	De Angelis et al. 2005	2005	6	0.4	0.1	6	0.3	0.1	1	Healthy	1	Rat
SV	Azevedo et al. 2003 (a)	2003	11	0.07	0.01	16	0.065	0.01	2	Hypertension	3	Rat
SV	Azevedo et al. 2003 (b)	2003	11	0.065	0.001	16	0.065	0.01	2	Hypertension	3	Rat
SV	Present study - 48h (a)		6	0.083	0.014	6	0.062	0.012	1	Healthy	2	Zebrafish - Present study - 48h
SV	Present study - 48h (b)		6	0.063	0.015	6	0.062	0.012	1	Healthy	2	Zebrafish - Present study - 48h
SV	Present study - 48h (c)		6	0.06	0.014	6	0.062	0.012	1	Healthy	2	Zebrafish - Present study - 48h
SV	Present study - 48h (d)		5	0.08	0.019	6	0.062	0.012	1	Healthy	2	Zebrafish - Present study - 48h
SV	Present study - 1h (a)		6	0.048	0.012	5	0.044	0.011	1	Healthy	1	Zebrafish - Present study -1h
SV	Present study - 1h (b)		6	0.05	0.007	5	0.044	0.011	1	Healthy	1	Zebrafish - Present study -1h
SV	Present study - 1h (c)		5	0.058	0.015	5	0.044	0.011	1	Healthy	1	Zebrafish - Present study -1h
SV	Present study - 1h (d)		5	0.048	0.004	5	0.044	0.011	1	Healthy	1	Zebrafish - Present study -1h
VD	Sudhir et al. 1993 (a)	1993	6	8.25	0.45	6	7.9	0.5	1	Healthy	1	Dog
VD	Sudhir et al. 1993 (b)	1993	6	8.69	0.6	6	7.9	0.5	1	Healthy	1	Dog
VD	Sudhir et al. 1993 (c)	1993	6	8.9	0.68	6	7.9	0.5	1	Healthy	1	Dog
VD	Sudhir et al. 1993 (d)	1993	6	9.5	0.8	6	7.9	0.5	1	Healthy	1	Dog
VD	Sudhir et al. 1993 (e)	1993	6	9.08	0.8	6	7.9	0.5	1	Healthy	1	Dog
VD	Gismondi et al. 2015	2015	16	9.4	2.35	16	7.9	1.97	2	Diabetes and hypertension	3	Human
VD	Schiffrin et al. 1999 (a)	1999	9	222	21	9	214	13	2	Hypertension	3	Human
VD	Schiffrin et al. 1999 (b)	1999	9	195	18	9	184	12	2	Hypertension	3	Human
VD	Koprodova et al. 2007 (a)	2007	6	251	11	6	213	4	2	Hypertension	3	Rat
VD	Koprodova et al. 2007 (b)	2007	6	214	7	6	220	15	1	Healthy	3	Rat
VD	Matrougui et al. 2000 (a)	2000	7	147.318	7.074	7	147.002	4.955	1	Healthy	1	Rat
VD	Matrougui et al. 2000 (b)	2000	7	148.701	7.22	7	149.048	5.386	1	Healthy	1	Rat
VD	Matrougui et al. 2000 (c)	2000	7	149.095	6.372	7	150.233	5.171	1	Healthy	1	Rat
VD	Matrougui et al. 2000 (d)	2000	7	153.487	5.815	7	154.973	4.74	1	Healthy	1	Rat
VD	Matrougui et al. 2000 (e)	2000	7	175.133	3.579	7	173.932	3.232	1	Healthy	1	Rat
VD	Matrougui et al. 2000 (f)	2000	7	180.339	5.163	7	180.718	4.309	1	Healthy	1	Rat
VD	Matrougui et al. 2000 (g)	2000	7	190.799	8.299	7	190.736	7.54	1	Healthy	1	Rat
VD	Matrougui et al. 2000 (h)	2000	7	175.08	4.673	7	175.871	3.124	1	Healthy	1	Rat
VD	Matrougui et al. 2000 (i)	2000	7	154.617	6.297	7	154.111	5.601	2	Hypertension	1	Rat
VD	Matrougui et al. 2000 (l)	2000	7	155.985	6.378	7	154.973	4.955	2	Hypertension	1	Rat
VD	Matrougui et al. 2000 (m)	2000	7	156.143	5.935	7	154.973	4.955	2	Hypertension	1	Rat
VD	Matrougui et al. 2000 (n)	2000	7	155.669	5.556	7	154.973	4.955	2	Hypertension	1	Rat
VD	Matrougui et al. 2000 (o)	2000	7	184.767	6.118	7	181.257	4.632	2	Hypertension	1	Rat
VD	Matrougui et al. 2000 (p)	2000	7	191.537	7.735	7	186.32	6.786	2	Hypertension	1	Rat
VD	Matrougui et al. 2000 (q)	2000	7	191.98	7.861	7	186.32	6.786	2	Hypertension	1	Rat
VD	Matrougui et al. 2000 (r)	2000	7	192.359	7.956	7	186.32	6.786	2	Hypertension	1	Rat
VD	Present study - 48h (a)		6	12.14	0.615	6	12.121	0.796	1	Healthy	2	Zebrafish - Present study - 48h
VD	Present study - 48h (b)		6	12.92	1.471	6	12.121	0.796	1	Healthy	2	Zebrafish - Present study - 48h
VD	Present study - 48h (c)		6	13.12	1.325	6	12.121	0.796	1	Healthy	2	Zebrafish - Present study - 48h
VD	Present study - 48h (d)		4	12.83	0.933	6	12.121	0.796	1	Healthy	2	Zebrafish - Present study - 48h
VD	Present study - 1h (a)		6	14.09	1.284	5	13.36	1.46	1	Healthy	1	Zebrafish - Present study -1h
VD	Present study - 1h (b)		6	14.37	0.867	5	13.36	1.46	1	Healthy	1	Zebrafish - Present study -1h
VD	Present study - 1h (c)		5	14.11	1.522	5	13.36	1.46	1	Healthy	1	Zebrafish - Present study -1h
VD	Present study - 1h (d)		5	14.1	0.611	5	13.36	1.46	1	Healthy	1	Zebrafish - Present study -1h

## Sheet: CAPTOPRIL
Endpoint	Study name	Year	Group A Number (treated)	Group A mean (treated)	Group A StD (treated)	Group B Number (control)	Group B mean (control)	Group B StD (control)	Health status (1 healthy, 2 disease)	Health status details	Exposure duration (1= short (up to 24h), 2= medium (between 24h and 2 weeks), 3= chronic (>2 weeks)	Species
BF	Shannon et al. 1997 (b)	1997	5	107	8	5	89	9	2	Heart failure	1	Dog
BF	Shannon et al. 1997 (c)	1997	5	105	7	5	96	5	2	Heart failure	1	Dog
BF	Shannon et al. 1997 (d)	1997	5	87	7	5	69	6	2	Heart failure	1	Dog
BF	Shannon et al. 1997 (e)	1997	5	57	3	5	41	6	2	Heart failure	1	Dog
BF	Shannon et al. 1997 (a)	1997	6	36	2	6	39	3	2	Heart failure	1	Dog
BF	Zimmerman et al. 1982 (a)	1982	6	271	20	6	265	18	2	Salt replete	1	Dog
BF	Zimmerman et al. 1982 (b)	1982	6	262	18	6	265	18	2	Salt replete	1	Dog
BF	Zimmerman et al. 1982 (c)	1982	6	273	41	6	249	35	2	Salt replete	1	Dog
BF	Zimmerman et al. 1982 (d)	1982	6	252	32	6	249	35	2	Salt replete	1	Dog
BF	Zimmerman et al. 1982 (e)	1982	6	266	22	6	254	20	2	Salt replete	1	Dog
BF	Zimmerman et al. 1982 (f)	1982	6	263	18	6	254	20	2	Salt replete	1	Dog
BF	Zimmerman et al. 1982 (g)	1982	6	327	53	6	284	42	2	Salt replete	1	Dog
BF	Zimmerman et al. 1982 (h)	1982	6	323	53	6	284	42	2	Salt replete	1	Dog
BF	Satoh et al. 1980	1980	8	134.5	15.5	8	115.5	11.9	2	Healthy	1	Dog
BF	Wong et al. 1981	1981	9	345	39	9	278	23	1	Salt replete	1	Dog
BF	Aznaouridis et al. 2007	2007	25	3.5	1.1	25	3.6	1.1	2	Hypertension	1	Human
BF	Burgraff et al. 1998 (a)	1998	9	304	166	9	298	129	1	Healthy	1	Human
BF	Burgraff et al. 1998 (b)	1998	9	291	158	9	298	129	1	Healthy	1	Human
BF	Schreij al. 1996 (a)	1996	50	12.6	5	50	10.9	5.2	2	Hypertension	1	Human
BF	Schreij al. 1996 (b)	1996	8	7.9	3.5	8	6.6	1.7	2	Hypertension	1	Human
BF	Schreij al. 1996 (c)	1996	25	8.9	4.4	25	9.3	5.4	2	Hypertension	1	Human
BF	Schreij al. 1996 (d)	1996	13	10.6	3.6	13	10.8	4.2	2	Hypertension	1	Human
BF	Schreij al. 1996 (e)	1996	50	11.4	3.9	50	10.7	4.1	2	Hypertension	1	Human
BF	Schreij al. 1996 (f)	1996	8	6.8	2.9	8	6.6	2	2	Hypertension	1	Human
BF	Schreij al. 1996 (g)	1996	25	8.2	4.3	25	8.2	4.4	2	Hypertension	1	Human
BF	Schreij al. 1996 (h)	1996	13	9.2	3.8	13	9.3	3.5	2	Hypertension	1	Human
BF	Schreij al. 1996 (i)	1996	50	11.2	4	50	10.5	4.2	2	Hypertension	1	Human
BF	Schreij al. 1996 (l)	1996	8	7.1	2.5	8	6.6	1.3	2	Hypertension	1	Human
BF	Schreij al. 1996 (m)	1996	25	7.9	4	25	8.8	4.9	2	Hypertension	1	Human
BF	Schreij al. 1996 (n)	1996	13	9.4	3.7	13	10.5	3.7	2	Hypertension	1	Human
BF	Van den Broek et al. 1995 (a)	1995	9	88	3	9	91	4	2	Heart failure	2	Human
BF	Van den Broek et al. 1995 (b)	1995	9	87	2	9	91	4	2	Heart failure	3	Human
BF	Van den Broek et al. 1995 (c)	1995	9	0.78	0.26	9	0.64	0.1	2	Heart failure	2	Human
BF	Van den Broek et al. 1995 (d)	1995	9	0.68	0.1	9	0.64	0.11	2	Heart failure	3	Human
BF	Koike et al. 1980 (a)	1980	6	3.673	0.828	7	3.166	0.662	2	Hypertension	3	Rat
BF	Koike et al. 1980 (c)	1980	6	18.114	3.972	7	20.092	1.983	2	Hypertension	3	Rat
BF	Koike et al. 1980 (e)	1980	6	3.43	0.828	7	3.255	0.661	2	Hypertension	3	Rat
BF	Koike et al. 1980 (g)	1980	6	8.773	1.324	7	5.947	1.489	2	Hypertension	3	Rat
BF	Koike et al. 1980 (i)	1980	6	3.684	0.498	7	3.179	1.158	2	Hypertension	3	Rat
BF	Koike et al. 1980 (m)	1980	6	48.247	6.618	7	41.292	4.625	2	Hypertension	3	Rat
BF	Koike et al. 1980 (o)	1980	6	3.28	0.827	7	3.103	0.331	2	Hypertension	3	Rat
BF	Koike et al. 1980 (q)	1980	6	29.801	3.309	7	25.322	1.654	2	Hypertension	3	Rat
BF	Koike et al. 1980 (s)	1980	6	10.318	0.33	7	8.984	0.662	2	Hypertension	3	Rat
BF	Koike et al. 1980 (u)	1980	6	2.918	0.662	7	2.74	0.496	2	Hypertension	3	Rat
BF	Koike et al. 1980 (z)	1980	6	10.572	1.82	7	10.564	0.496	2	Hypertension	3	Rat
BF	Skinner et al. 1996 (a)	1996	6	2.32	0.44	14	3.61	0.4	1	Hypertension	3	Rat
BF	Skinner et al. 1996 (b)	1996	6	1.31	0.26	14	2.07	0.23	1	Hypertension	3	Rat
BF	Skinner et al. 1996 (c)	1996	6	1.52	0.28	14	2.44	0.25	1	Hypertension	3	Rat
BF	Skinner et al. 1996 (d)	1996	6	0.94	0.09	14	1.1	0.08	1	Hypertension	3	Rat
BF	Skinner et al. 1996 (e)	1996	6	0.45	0.09	14	0.6	0.08	1	Hypertension	3	Rat
BF	Skinner et al. 1996 (f)	1996	6	5.03	0.94	6	3.94	0.72	2	Healthy	3	Rat
BF	Skinner et al. 1996 (g)	1996	6	2.27	0.47	6	2.23	0.36	2	Healthy	3	Rat
BF	Skinner et al. 1996 (h)	1996	6	3.57	0.51	6	3.07	0.4	2	Healthy	3	Rat
BF	Skinner et al. 1996 (i)	1996	6	1.85	0.32	6	1.87	0.25	2	Healthy	3	Rat
BF	Skinner et al. 1996 (l)	1996	6	0.73	0.1	6	0.9	0.08	2	Healthy	3	Rat
BF	Koike et al. 1980 (b)	1980	7	5.339	0.496	7	3.166	0.662	2	Hypertension	3	Rat
BF	Koike et al. 1980 (d)	1980	7	20.607	2.814	7	20.092	1.983	2	Hypertension	3	Rat
BF	Koike et al. 1980 (f)	1980	7	4.269	0.661	7	3.255	0.661	2	Hypertension	3	Rat
BF	Koike et al. 1980 (h)	1980	7	6.466	1.821	7	5.947	1.489	2	Hypertension	3	Rat
BF	Koike et al. 1980 (l)	1980	7	3.859	0.497	7	3.179	1.158	2	Hypertension	3	Rat
BF	Koike et al. 1980 (n)	1980	7	66.624	9.598	7	41.292	4.625	2	Hypertension	3	Rat
BF	Koike et al. 1980 (p)	1980	7	3.787	0.496	7	3.103	0.331	2	Hypertension	3	Rat
BF	Koike et al. 1980 (r)	1980	7	29.977	1.821	7	25.322	1.654	2	Hypertension	3	Rat
BF	Koike et al. 1980 (t)	1980	7	9.338	0.827	7	8.984	0.662	2	Hypertension	3	Rat
BF	Koike et al. 1980 (v)	1980	7	2.928	0.496	7	2.74	0.496	2	Hypertension	3	Rat
BF	Koike et al. 1980 (za)	1980	7	13.396	1.325	7	10.564	0.496	2	Hypertension	3	Rat
BF	Rozsa & Sonkodi 1995 (a)	1995	10	5	0.5	10	4.2	0.42	2	Healthy	3	Rat
BF	Rozsa & Sonkodi 1995 (b)	1995	10	4.2	0.42	10	2.9	0.29	2	Hypertension	3	Rat
BF	Present study - 1h (a)		6	0.126	0.027	6	0.218	0.05	1	Healthy	1	Zebrafish - Present study - 1h
BF	Present study - 1h (b)		5	0.152	0.052	6	0.218	0.05	1	Healthy	1	Zebrafish - Present study - 1h
BF	Present study - 1h (c)		5	0.164	0.073	6	0.218	0.05	1	Healthy	1	Zebrafish - Present study - 1h
BF	Present study - 1h (d)		4	0.168	0.043	6	0.218	0.05	1	Healthy	1	Zebrafish - Present study - 1h
BF	Present study - 48h (a)		5	0.212	0.048	6	0.263	0.076	1	Healthy	2	Zebrafish - Present study - 48h
BF	Present study - 48h (b)		6	0.182	0.056	6	0.263	0.076	1	Healthy	2	Zebrafish - Present study - 48h
BF	Present study - 48h (c)		6	0.182	0.074	6	0.263	0.076	1	Healthy	2	Zebrafish - Present study - 48h
BF	Present study - 48h (d)		6	0.22	0.037	6	0.263	0.076	1	Healthy	2	Zebrafish - Present study - 48h
HR	Shannon et al. 1997	1997	9	109	6	9	119	4	2	Heart failure	1	Dog
HR	Lynch et al. 1999	1999	10	120	4	9	115	3	2	Myocardial infarction	1	Dog
HR	Jugdutt 1995 (a)	1995	12	125	16	12	137	21	2	Heart failure	2	Dog
HR	Jugdutt 1995 (b)	1995	12	126	17	12	137	21	2	Heart failure	3	Dog
HR	Jugdutt 1995 (c)	1995	12	107	16	12	137	21	2	Heart failure	3	Dog
HR	Aznaouridis et al. 2007	2007	25	74.1	16.8	25	74.1	16.8	2	Hypertension	1	Human
HR	Burgraff et al. 1998 (a)	1998	9	56	4.7	9	55.1	5	1	Healthy	1	Human
HR	Burgraff et al. 1998 (b)	1998	9	57.6	4.9	9	55.1	5	1	Healthy	1	Human
HR	Cleland et al. 1991 (a)	1991	16	81	6	16	84	4	2	Heart failure	2	Human
HR	Cleland et al. 1991 (b)	1991	16	76	5	16	82	4	2	Heart failure	2	Human
HR	Cleland et al. 1991 (c)	1991	16	121	14	16	120	16	2	Heart failure	2	Human
HR	Cleland et al. 1991 (d)	1991	16	133	13	16	130	14	2	Heart failure	2	Human
HR	Massie et al. 1982 (a)	1982	14	77	11	14	82	10	2	Heart failure	1	Human
HR	Massie et al. 1982 (b)	1982	14	111	15	14	115	18	2	Heart failure	1	Human
HR	Sturani et al. 1982	1982	15	70.9	2.2	15	75.6	2.5	2	Hypertension	3	Human
HR	Vandenburg et al. 1983 (a)	1983	9	73	4	9	76	4	2	Hypertension	3	Human
HR	Vandenburg et al. 1983 (b)	1983	9	85	4	9	86	4	2	Hypertension	3	Human
HR	Vandenburg et al. 1983 (c)	1983	9	76	3	9	76	4	2	Hypertension	3	Human
HR	Konstam et al. 2000 (a)	2000	16	71	10	16	82	13	2	Heart failure	2	Human
HR	Konstam et al. 2000 (b)	2000	16	75	14	16	82	13	2	Heart failure	2	Human
HR	Jin et al. 2001	2001	6	397.5	14.5	6	410.8	4	2	Myocardial infarction	3	Rat
HR	Miguel-Carrasco et al. 2010 (a)	2010	6	339	18	6	342	11	1	Healthy	3	Rat
HR	Miguel-Carrasco et al. 2010 (b)	2010	6	339	17	6	392	26	2	Healthy	3	Rat
HR	Skinner et al. 1996 (a)	1996	6	445	22	14	494	22	2	Hypertension	3	Rat
HR	Skinner et al. 1996 (b)	1996	6	345	38	6	369	30	1	Healthy	3	Rat
HR	da Silva et al. 2002 (b)	2002	7	311	25	10	405	11	1	Healthy	3	Rat
HR	Raya & Lee 1989	1989	7	338	5	9	353	12	2	Heart failure	3	Rat
HR	Pfeffer et al. 1985 (d)	1985	8	369	13	8	378	17	2	Myocardial infarction	3	Rat
HR	Wang & Prewitt 1991 (c)	1991	9	338	12	9	365	12	1	Healthy	3	Rat
HR	da Silva et al. 2002 (a)	2002	10	374	15	10	381	11	1	Healthy	3	Rat
HR	Wang & Prewitt 1991 (a)	1991	10	402	14	9	410	13	1	Healthy	2	Rat
HR	Pfeffer et al. 1985 (b)	1985	11	375	19	8	392	14	2	Myocardial infarction	3	Rat
HR	Wang & Prewitt 1991 (b)	1991	11	349	26	11	378	3	1	Healthy	3	Rat
HR	Pfeffer et al. 1985 (e)	1985	21	367	9	9	377	17	2	Myocardial infarction	3	Rat
HR	Pfeffer et al. 1985 (a)	1985	23	382	10	36	383	7	1	Healthy	3	Rat
HR	Pfeffer et al. 1985 (c)	1985	23	370	9	16	397	11	2	Myocardial infarction	3	Rat
HR	Present study - 1h (a)		6	231	15.2	6	242.3	16.23	1	Healthy	1	Zebrafish - Present study - 1h
HR	Present study - 1h (b)		5	229.1	6.301	6	242.3	16.23	1	Healthy	1	Zebrafish - Present study - 1h
HR	Present study - 1h (c)		5	238.9	10.08	6	242.3	16.23	1	Healthy	1	Zebrafish - Present study - 1h
HR	Present study - 1h (d)		4	229.5	13.23	6	242.3	16.23	1	Healthy	1	Zebrafish - Present study - 1h
HR	Present study - 48h (a)		5	227.7	8.74	6	248.2	16.21	1	Healthy	2	Zebrafish - Present study - 48h
HR	Present study - 48h (b)		6	225	7.229	6	248.2	16.21	1	Healthy	2	Zebrafish - Present study - 48h
HR	Present study - 48h (c)		6	225.5	28.42	6	248.2	16.21	1	Healthy	2	Zebrafish - Present study - 48h
HR	Present study - 48h (d)		6	224.2	29.05	6	248.2	16.21	1	Healthy	2	Zebrafish - Present study - 48h
SV	Blackford et al. 1990 (a)	1990	5	35	7	10	29	18	2	Mitral regurgitation	3	Dog
SV	Blackford et al. 1990 (b)	1990	5	11	11	10	18	13	2	Mitral regurgitation	3	Dog
SV	Leier et al. 1983 (a)	1983	7	24.7	15.9	7	24	14.3	2	Hypertension	3	Human
SV	Leier et al. 1983 (b)	1983	7	25.9	15.5	7	24.8	13.3	2	Hypertension	3	Human
SV	Leier et al. 1983 (c)	1983	7	21.2	5.1	7	21	5.8	2	Hypertension	3	Human
SV	Massie et al. 1982 (a)	1982	14	27	7	14	25	8	2	Heart failure	1	Human
SV	Massie et al. 1982 (b)	1982	14	33	7	14	30	8	2	Heart failure	1	Human
SV	Schanzenbacher & Liebau 1983	1983	9	36	7	9	31	7	2	Chronic left ventricular volume overload	1	Human
SV	Pfeffer et al. 1985 (d)	1985	8	0.65	0.06	8	0.45	0.04	2	Myocardial infarction	3	Rat
SV	Pfeffer et al. 1982 (a)	1982	9	0.66	0.04	13	0.62	0.04	1	Healthy	3	Rat
SV	Pfeffer et al. 1982 (b)	1982	9	0.77	0.06	11	0.46	0.03	2	Hypertension	3	Rat
SV	Pfeffer et al. 1985 (b)	1985	11	0.73	0.03	8	0.66	0.08	2	Myocardial infarction	3	Rat
SV	Pfeffer et al. 1985 (e)	1985	21	0.57	0.04	9	0.56	0.04	2	Myocardial infarction	3	Rat
SV	Pfeffer et al. 1985 (a)	1985	23	0.68	0.03	36	0.66	0.03	1	Healthy	3	Rat
SV	Pfeffer et al. 1985 (c)	1985	23	0.65	0.03	16	0.56	0.03	2	Myocardial infarction	3	Rat
SV	Present study - 1h (a)		6	0.032	0.008	6	0.055	0.01	1	Healthy	1	Zebrafish - Present study - 1h
SV	Present study - 1h (b)		5	0.042	0.011	6	0.055	0.01	1	Healthy	1	Zebrafish - Present study - 1h
SV	Present study - 1h (c)		5	0.04	0.016	6	0.055	0.01	1	Healthy	1	Zebrafish - Present study - 1h
SV	Present study - 1h (d)		4	0.043	0.012	6	0.055	0.01	1	Healthy	1	Zebrafish - Present study - 1h
SV	Present study - 48h (a)		5	0.054	0.011	6	0.062	0.017	1	Healthy	2	Zebrafish - Present study - 48h
SV	Present study - 48h (b)		6	0.047	0.012	6	0.062	0.017	1	Healthy	2	Zebrafish - Present study - 48h
SV	Present study - 48h (c)		6	0.05	0.02	6	0.062	0.017	1	Healthy	2	Zebrafish - Present study - 48h
SV	Present study - 48h (d)		6	0.06	0.021	6	0.062	0.017	1	Healthy	2	Zebrafish - Present study - 48h
VD	Aznaouridis et al. 2007	2007	25	4.124	0.6	25	4.12	0.6	2	Hypertension	1	Human
VD	Chau et al. 1992	1992	8	0.462	0.005	8	0.44	0.009	2	Hypertension	1	Human
VD	Kimura et al. 1991 (a)	1991	5	14.9	1	5	11.1	0.7	2	Hypertension	2	Rat
VD	Kimura et al. 1991 (b)	1991	5	15.2	1.2	5	11.7	0.8	2	Hypertension	2	Rat
VD	Kimura et al. 1991 (c)	1991	5	15.4	0.4	6	12.7	0.8	2	Hypertension	3	Rat
VD	Kimura et al. 1991 (d)	1991	5	15.5	0.3	6	11.7	0.8	2	Hypertension	3	Rat
VD	Wang & Prewitt 1991 (c)	1991	9	13.6	0.56	9	13.87	0.47	1	Healthy	3	Rat
VD	Freslon & Giudicelli 1983 (a)	1983	10	222	9	10	220	7	2	Hypertension	3	Rat
VD	Freslon & Giudicelli 1983 (b)	1983	10	276	7	10	250	8	2	Hypertension	3	Rat
VD	Wang & Prewitt 1991 (a)	1991	10	12.04	0.57	9	11.8	1	1	Healthy	2	Rat
VD	Wang & Prewitt 1991 (b)	1991	11	13.56	0.78	11	12.85	0.41	1	Healthy	3	Rat
VD	Present study - 1h (a)		6	14.35	1.405	6	13.79	0.348	1	Healthy	1	Zebrafish - Present study - 1h
VD	Present study - 1h (b)		5	13.75	1.576	6	13.79	0.348	1	Healthy	1	Zebrafish - Present study - 1h
VD	Present study - 1h (c)		4	13.29	1.364	6	13.79	0.348	1	Healthy	1	Zebrafish - Present study - 1h
VD	Present study - 1h (d)		4	15.11	1.299	6	13.79	0.348	1	Healthy	1	Zebrafish - Present study - 1h
VD	Present study - 48h (a)		5	14.26	0.984	6	12.83	0.603	1	Healthy	2	Zebrafish - Present study - 48h
VD	Present study - 48h (b)		6	13.93	2.233	6	12.83	0.603	1	Healthy	2	Zebrafish - Present study - 48h
VD	Present study - 48h (c)		6	13.26	0.902	6	12.83	0.603	1	Healthy	2	Zebrafish - Present study - 48h
VD	Present study - 48h (d)		6	14.54	2.377	6	12.83	0.603	1	Healthy	2	Zebrafish - Present study - 48h
